# Supplementary material for: Pathogenic variants of sphingomyelin synthase SMS2 disrupt lipid landscapes in the secretory pathway
Source: eLife. 2022 Sep 14;11:e79278. doi: 10.7554/eLife.79278 (PMC9531943; doi:10.7554/eLife.79278)
Supplement: Figure 2—source data 2. [file elife-79278-fig2-data2.xlsx]

## Sheet: Sheet1
			Lipids expressed as mol% of total phospholipid analyzed
	minus dox	WT			∆SMS1/2			SMS2			SMS2D276A			SMS2I62S			SMS2I62S/D276A			SMS2M64R			SMS2M64R/D276A					minus dox		WT			∆SMS1/2			SMS2			SMS2D276A			SMS2I62S			SMS2I62S/D276A			SMS2M64R
		Rep 1	Rep 2	Rep 3	Rep 1	Rep 2	Rep 3	Rep 1	Rep 2	Rep 3	Rep 1	Rep 2	Rep 3	Rep 1	Rep 2	Rep 3	Rep 1	Rep 2	Rep 3	Rep 1	Rep 2	Rep 3	Rep 1	Rep 2	Rep 3					Rep 1	Rep 2	Rep 3	Rep 1	Rep 2	Rep 3	Rep 1	Rep 2	Rep 3	Rep 1	Rep 2	Rep 3	Rep 1	Rep 2	Rep 3	Rep 1	Rep 2	Rep 3	Rep 1	Rep 2
	SM	5.28461	5.22301	5.25977	0.0847418	0.0815587	0.0850633	0.101094	0.107596	0.110199	0.0703619	0.0720699	0.0705527	0.105814	0.109779	0.112006	0.0947465	0.089869	0.0832914	0.108202	0.107086	0.108305	0.0813035	0.0823369	0.0731456			Cer(d18:0_16:0)	d18:0/16:0	0.00330563	0.00301259	0.00251073	0.00243992	0.00191851	0.0016841	0.00233023	0.00214665	0.00201256	0.00153601	0.00166133	0.00129819	0.0015939	0.00154043	0.000689416	0.00608636	0.00355546	0.00324705	0.0023383	0.0022348
	Cer	0.100248	0.0951776	0.096749	0.117472	0.115326	0.111936	0.101686	0.11153	0.114513	0.0904024	0.0958234	0.0928591	0.0879211	0.0933049	0.0878819	0.169226	0.147963	0.134087	0.136041	0.129966	0.126842	0.120339	0.123398	0.117964			Cer(d18:1_16:0)	d18:1/16:0	0.0143111	0.0142926	0.0132111	0.0203297	0.0185242	0.0194735	0.0169075	0.016627	0.0187239	0.0151217	0.0160513	0.01504	0.0174372	0.017095	0.0168659	0.0220656	0.0204016	0.0211442	0.0199036	0.0193213
	HexCer	0.0937938	0.0928615	0.0904601	0.426085	0.425694	0.435818	0.352135	0.383703	0.406483	0.391909	0.409651	0.407777	0.365879	0.394882	0.394936	0.430247	0.444906	0.428092	0.406287	0.389763	0.388027	0.403582	0.442699	0.392756			Cer(d18:1_22:0)	d18:1/22:0	0.00600208	0.00444985	0.00516471	0.00471803	0.00396241	0.00358828	0.00234627	0.00255756	0.00444098	0.00244975	0.00269951	0.00259394	0.00175808	0.00244752	0.00176716	0.0100764	0.00877316	0.0067094	0.00757185	0.00687398
																												Cer(d18:1_22:1)	d18:1/22:1	0.00543364	0.00543693	0.00515017	0.00528559	0.00523174	0.00491671	0.00580345	0.00597124	0.00596495	0.00379383	0.00344062	0.00347198	0.00357979	0.00347036	0.0036155	0.00503225	0.00431674	0.00422303	0.00537184	0.00525668
	plus dox	WT			∆SMS1/2			SMS2			SMS2D276A			SMS2I62S			SMS2I62S/D276A			SMS2M64R			SMS2M64R/D276A					Cer(d18:1_24:0)	d18:1/24:0	0.0132156	0.0109139	0.0122083	0.0125468	0.0101812	0.0108323	0.00402547	0.00501922	0.00769982	0.00644386	0.00808988	0.00673814	0.00597748	0.00767225	0.00467628	0.0403755	0.030173	0.0252892	0.0234272	0.0199716
		Rep 1	Rep 2	Rep 3	Rep 1	Rep 2	Rep 3	Rep 1	Rep 2	Rep 3	Rep 1	Rep 2	Rep 3	Rep 1	Rep 2	Rep 3	Rep 1	Rep 2	Rep 3	Rep 1	Rep 2	Rep 3	Rep 1	Rep 2	Rep 3			Cer(d18:2_24:1)	d18:2/24:1	0.0292714	0.0314131	0.0325259	0.0478988	0.0510079	0.0474952	0.0381188	0.0426408	0.0424198	0.0410318	0.0421694	0.0435854	0.0372823	0.0405883	0.0404381	0.0433457	0.0427744	0.0413343	0.0408429	0.0416937
	SM	4.7248	4.9151	4.7526	0.0824916	0.0812039	0.0823154	1.74062	1.60634	1.80711	0.0698389	0.0664379	0.0707636	4.6435	5.72728	5.79196	0.0774244	0.0757474	0.0744206	5.12868	5.33166	5.36163	0.0789535	0.0698413	0.072171
	Cer	0.0853743	0.090636	0.0881441	0.118999	0.115551	0.124096	0.0988561	0.100894	0.0982171	0.0894373	0.0861365	0.0899955	0.0829113	0.140287	0.136836	0.114131	0.116874	0.114927	0.120674	0.135256	0.132071	0.128961	0.121354	0.125198
	HexCer	0.0799581	0.082982	0.0923182	0.425744	0.403524	0.41626	0.298785	0.30965	0.291618	0.38409	0.376704	0.394679	0.297702	0.349206	0.353877	0.425913	0.412313	0.407239	0.262779	0.27867	0.284904	0.427603	0.373686	0.397369			plus dox		WT			∆SMS1/2			SMS2			SMS2D276A			SMS2I62S			SMS2I62S/D276A			SMS2M64R
																														Rep 1	Rep 2	Rep 3	Rep 1	Rep 2	Rep 3	Rep 1	Rep 2	Rep 3	Rep 1	Rep 2	Rep 3	Rep 1	Rep 2	Rep 3	Rep 1	Rep 2	Rep 3	Rep 1	Rep 2
																												Cer(d18:0_16:0)	d18:0/16:0	0.00255671	0.00247693	0.00266771	0.00179794	0.0017572	0.00195213	0.00229437	0.00293895	0.00249174	0.00128063	0.000848415	0.00109931	0.00598892	0.0132601	0.0134942	0.00167192	0.00193641	0.00160868	0.0100596	0.0110735
	minus dox	Average									Std																	Cer(d18:1_16:0)	d18:1/16:0	0.0135894	0.0141635	0.0138715	0.0228196	0.0221541	0.0232553	0.0160613	0.0161448	0.0155457	0.0187669	0.0171443	0.0183241	0.018514	0.0324003	0.0314734	0.0227608	0.021125	0.0224879	0.027674	0.0298439
		WT	∆SMS1/2	SMS2	SMS2D276A	SMS2I62S	SMS2I62S/D276A	SMS2M64R	SMS2M64R/D276A		WT	∆SMS1/2	SMS2	SMS2D276A	SMS2I62S	SMS2I62S/D276A	SMS2M64R	SMS2M64R/D276A										Cer(d18:1_22:0)	d18:1/22:0	0.0047376	0.0044813	0.00463833	0.00547016	0.00475249	0.00575093	0.00376023	0.00434467	0.00360016	0.00233433	0.00180033	0.00242107	0.00410957	0.0113742	0.0113056	0.00458686	0.00491411	0.00447536	0.00791222	0.00937355
	SM	5.25579	0.083788	0.106296	0.0709948	0.1092	0.0893023	0.107865	0.0789286		0.03099	0.00193727	0.0046896	0.000935901	0.00313614	0.00574851	0.000676015	0.00503484										Cer(d18:1_22:1)	d18:1/22:1	0.00519107	0.00518679	0.00531508	0.00592207	0.00539521	0.00595532	0.00629799	0.00691921	0.00597563	0.00379195	0.00370838	0.00362548	0.00500556	0.00885348	0.0079756	0.00463233	0.00436119	0.00437575	0.00771824	0.0091596
	Cer	0.0973916	0.114911	0.109243	0.0930283	0.2269	0.299737	0.130949	0.120567		0.00259562	0.00279073	0.00671224	0.00271448	0.00311972	0.0176983	0.00467794	0.00272452										Cer(d18:1_24:0)	d18:1/24:0	0.00886936	0.0090747	0.00969043	0.0119968	0.0116921	0.0128474	0.00495108	0.00515534	0.00526596	0.00495374	0.00400128	0.00506716	0.00521174	0.0205599	0.0221068	0.0156365	0.017386	0.015131	0.0133599	0.0165146
	HexCer	0.0923718	0.429199	0.380774	0.403112	0.365879	0.430247	0.394692	0.413012		0.00171996	0.00573588	0.0272922	0.00974747	0.0167605	0.00914911	0.010079	0.0262734										Cer(d18:2_24:1)	d18:2/24:1	0.0260359	0.0290989	0.0280376	0.046039	0.0438346	0.0451218	0.031325	0.0310833	0.0299666	0.0381281	0.0388018	0.0396269	0.020464	0.0268484	0.0243948	0.0407063	0.0417159	0.040944	0.0221202	0.024936
	plus dox	Average									Std																	minus dox	Average										Std
		WT	∆SMS1/2	SMS2	SMS2D276A	SMS2I62S	SMS2I62S/D276A	SMS2M64R	SMS2M64R/D276A		WT	∆SMS1/2	SMS2	SMS2D276A	SMS2I62S	SMS2I62S/D276A	SMS2M64R	SMS2M64R/D276A												WT	∆SMS1/2	SMS2	SMS2D276A	SMS2I62S	SMS2I62S/D276A	SMS2M64R	SMS2M64R/D276A		WT	∆SMS1/2	SMS2	SMS2D276A	SMS2I62S	SMS2I62S/D276A	SMS2M64R	SMS2M64R/D276A
	SM	4.7975	0.0820036	1.71803	0.0690135	5.38758	0.0758641	5.27399	0.0736553		0.102788	0.00069817	0.102277	0.00227794	0.6452	0.00150528	0.126732	0.00473393										Cer(d18:0_16:0)	d18:0/16:0	0.00294298	0.00201418	0.00216315	0.00149851	0.00127458	0.00429629	0.0021939	0.00188146		0.000401999	0.000386888	0.000159479	0.000184455	0.000507475	0.0015579	0.000168619	0.000100375
	Cer	0.0880515	0.119549	0.0993223	0.0885231	0.120012	0.11531	0.129334	0.125171		0.00263211	0.00429931	0.00139785	0.0020856	0.0321762	0.00141116	0.00766678	0.00380361										Cer(d18:1_16:0)	d18:1/16:0	0.0139383	0.0194424	0.0174195	0.0154043	0.0171327	0.0212038	0.019268	0.0191086		0.000629825	0.000903146	0.00113837	0.000561797	0.000287516	0.000833617	0.000663961	0.0012148
	HexCer	0.0850861	0.415176	0.300018	0.385158	0.333595	0.415155	0.275451	0.399553		0.0064431	0.0111494	0.00907907	0.00903491	0.0311718	0.00965573	0.0114086	0.0270248										Cer(d18:1_22:0)	d18:1/22:0	0.00520555	0.00408957	0.00311494	0.00258107	0.00199092	0.00851965	0.00683488	0.00460939		0.000776919	0.000575508	0.00115324	0.000125376	0.000395455	0.00169774	0.000757276	0.00015936
																												Cer(d18:1_22:1)	d18:1/22:1	0.00534025	0.00514468	0.00591321	0.00356881	0.00355521	0.00452401	0.00525511	0.00535072		0.00016462	0.000199254	9.51064e-05	0.000195505	7.56246e-05	0.000442639	0.000117525	0.000255728
																												Cer(d18:1_24:0)	d18:1/24:0	0.0121126	0.0111868	0.0055815	0.00709063	0.00610867	0.0319459	0.0209985	0.0148622		0.00115385	0.00122198	0.00190061	0.000877802	0.00150229	0.00769782	0.00211162	0.00184785
	Note: HexCer=GSL																											Cer(d18:2_24:1)	d18:2/24:1	0.0310701	0.0488006	0.0410598	0.0422622	0.0394362	0.0424848	0.0414161	0.0393646		0.00165417	0.00192217	0.00254935	0.00127933	0.00186687	0.00103653	0.000496496	0.00151909
																												plus dox
																														WT	∆SMS1/2	SMS2	SMS2D276A	SMS2I62S	SMS2I62S/D276A	SMS2M64R	SMS2M64R/D276A		WT	∆SMS1/2	SMS2	SMS2D276A	SMS2I62S	SMS2I62S/D276A	SMS2M64R	SMS2M64R/D276A
																												Cer(d18:0_16:0)	d18:0/16:0	0.00256712	0.00183576	0.00257502	0.00107612	0.0109144	0.001739	0.0109848	0.00241158		9.58123e-05	0.000102823	0.00033026	0.000217038	0.0042672	0.00017386	0.000884242	7.34339e-05
																												Cer(d18:1_16:0)	d18:1/16:0	0.0138748	0.022743	0.0159173	0.0180784	0.0274626	0.0221246	0.0290914	0.021822		0.000287071	0.000554587	0.00032447	0.000838732	0.00776351	0.000876325	0.00122825	0.00167188
																												Cer(d18:1_22:0)	d18:1/22:0	0.00461908	0.00532453	0.00390169	0.00218524	0.0089298	0.00465878	0.0083463	0.00592972		0.00012923	0.000514909	0.00039189	0.000336155	0.00417459	0.000228043	0.00089317	0.000863291
																												Cer(d18:1_22:1)	d18:1/22:1	0.00523098	0.00575753	0.00639761	0.0037086	0.00727821	0.00445642	0.00827701	0.00588967		7.28626e-05	0.00031422	0.000479616	8.32325e-05	0.00201653	0.000152513	0.000773317	4.46674e-05
																												Cer(d18:1_24:0)	d18:1/24:0	0.0092115	0.0121788	0.00512413	0.00467406	0.0159595	0.0160512	0.0154935	0.0144466		0.000427285	0.000598764	0.000159745	0.000585399	0.00933989	0.00118333	0.00184828	0.00170948
																												Cer(d18:2_24:1)	d18:2/24:1	0.0277241	0.0449985	0.0307916	0.0388523	0.0239024	0.0411221	0.0232818	0.0369156		0.00155537	0.00110739	0.00072464	0.0007507	0.00322059	0.000527853	0.00147108	0.00210863
[truncated: 30 more columns]
