# Supplementary material for: Pathogenic variants of sphingomyelin synthase SMS2 disrupt lipid landscapes in the secretory pathway
Source: eLife. 2022 Sep 14;11:e79278. doi: 10.7554/eLife.79278 (PMC9531943; doi:10.7554/eLife.79278)
Supplement: Figure 3—source data 2. [file elife-79278-fig3-data2.xlsx]

## Sheet: Fig. 3C
			Lipid species expressed as mol% of total lipid analyzed
		WC					ER
		Rep 1	Rep 2	Rep 3	Rep 4		Rep 1	Rep 2	Rep 3	Rep 4
	SM	7.36348	6.32018	7.17348	7.30619		1.36482	1.21511	0.996871	1.05917
	Cer	0.351126	1.41757	0.787351	0.84915		0.551796	0.733309	0.721174	0.584044
	Cer/SM	0.0476848	0.224292	0.109758	0.116223		0.4043	0.603492	0.723438	0.551419
	Chol	26.3947	24.472	24.6167	23.2966		7.68281	8.70875	7.05618	6.10675
	BMP (PG40:6)	0.00812374	0.00306511	0.00263994	0.00138134		0	0	0	0
	PC	39.7984	30.7251	35.4503	33.8688		63.5214	64.1702	65.2387	58.6294
	CL	2.85976	0.466834	1.49536	1.53791		0.0256173	0.0115656	0.173063	0.168519
		Average		STD		p value, paired two-tailed t-test
		WC	ER	WC	ER
	SM	7.04084	1.15899	0.48698	0.165088	4.56928e-07
	Cer	0.851299	0.647581	0.43777	0.0930538	0.397725
	Cer/SM	0.12449	0.570662	0.0733596	0.132243	0.00105265
	Chol	24.695	7.38862	1.27804	1.09286	8.55387e-07
	BMP (PG40:6)	0.00380253	0	0.00296819	0	0.0427823
	PC	34.9607	62.8899	3.77604	2.92727	2.36122e-05
	CL	1.58997	0.0946912	0.980724	0.088079	0.0228879
	Note- data in 3c are part of 3d

## Sheet: Fig. 3D
					Lipid species expressed as mol% of total lipid analyzed
	WT													∆SMS1/2													SMS2													SMS2M64R
	WC				ER				WC	ER	WC	ER		WC				ER				WC	ER	WC	ER		WC				ER				WC	ER	WC	ER		WC				ER				WC	ER
	Replicate 1	Replicate 2	Replicate 3	Replicate 4	Replicate 1	Replicate 2	Replicate 3	Replicate 4	Average		Std			Replicate 1	Replicate 2	Replicate 3	Replicate 4	Replicate 1	Replicate 2	Replicate 3	Replicate 4	Average		Std			Replicate 1	Replicate 2	Replicate 3	Replicate 4	Replicate 1	Replicate 2	Replicate 3	Replicate 4	Average		Std			Replicate 1	Replicate 2	Replicate 3	Replicate 4	Replicate 1	Replicate 2	Replicate 3	Replicate 4	Average
SM	7.36348	6.32018	7.17348	7.30619	1.36482	1.21511	0.996871	1.05917	7.04084	1.15899	0.48698	0.165088		0.280921	0.204779	0.197055	0.208507	0.374525	0.0141096	0.234122	0.0598692	0.222815	0.170656	0.0390292	0.165701		7.32172	3.00193	6.98679	7.15576	2.4266	0.917109	1.44632	1.37492	6.11655	1.54124	2.08091	0.635102		11.5861	8.22954	9.82677	11.2737	11.7445	8.87283	9.56247	9.80108	10.229	9.99523
PC	39.7984	30.7251	35.4503	33.8688	63.5214	64.1702	65.2387	58.6294	34.9607	62.8899	3.77604	2.92727		46.7003	41.1555	43.8295	41.8064	70.2571	68.7	53.1885	64.7306	43.3729	64.2191	2.49338	7.71301		37.7266	38.0041	33.3279	33.3324	57.8681	65.5309	66.8937	57.3491	35.5978	61.9104	2.62084	5.0029		31.557	30.6333	27.6994	27.7625	52.3532	44.9276	41.04	45.9238	29.4131	46.0611
GSL	0.803035	0.675601	0.844898	0.768171	0.594616	0.401934	0.260691	0.261854	0.772926	0.379774	0.072068	0.157833		2.01912	1.67777	2.03962	2.0823	0.543058	0.541065	2.11538	0.978711	1.9547	1.04455	0.186488	0.742969		1.34067	2.26698	1.20937	1.27846	1.44877	0.740687	0.313952	0.406489	1.52387	0.727475	0.498299	0.514613		1.36956	1.95665	1.19538	1.08948	0.627855	1.14804	0.618987	0.546966	1.40277	0.735463
DAG	1.46025	1.18423	1.08187	1.15662	1.86332	2.12122	1.79024	1.39674	1.22074	1.79288	0.16542	0.299835		1.67054	1.10479	1.06792	1.05673	2.42634	2.18224	1.54908	1.92251	1.22499	2.02004	0.297741	0.375367		1.38365	0.944316	0.532264	0.756517	2.24518	1.41314	1.36708	1.70207	0.904188	1.68187	0.361309	0.403746		1.70707	1.02773	1.23644	1.43942	2.52215	2.94156	4.91157	4.2587	1.35267	3.65849
Cer	0.351126	1.41757	0.787351	0.84915	0.551796	0.733309	0.721174	0.584044	0.851299	0.647581	0.43777	0.0930538		0.376449	1.19523	0.892479	1.11022	0.740447	0.832035	0.610829	0.66071	0.893595	0.711005	0.367583	0.0967472		0.252559	0.76376	0.724256	0.748106	0.456647	0.680349	0.419007	0.429789	0.62217	0.496448	0.246942	0.123618		0.210852	1.106	1.03518	0.810451	0.348245	0.394639	0.236633	0.379888	0.790622	0.339851
PS	0.988982	0.581849	1.04871	0.912386	0.560251	0.437798	0.365267	0.565997	0.882982	0.482328	0.208365	0.0979094		0.94942	0.768399	0.823368	0.813049	0.418998	0.432913	1.79682	0.48643	0.838559	0.783789	0.077662	0.675976		1.36686	0.835484	1.12249	1.05755	0.580519	0.363553	0.525197	0.902088	1.0956	0.592839	0.218641	0.225784		0.994341	0.699106	0.598118	0.597867	0.825054	0.562723	0.729147	0.301417	0.722358	0.604585
CerP	0.00222858	0.0151289	0.00649614	0.00990067	0	0	0	0.000124983	0.00843856	3.12458e-05	0.00545389	6.24917e-05		0	0.000172057	0.00048808	0	0.000242508	0.000105447	0.00129245	0.00068977	0.000165034	0.000582543	0.000230131	0.000535011		0.0038438	0.00336574	0.0176194	0.028647	0.000776219	0	0.000263613	0.00532203	0.013369	0.00159047	0.0121419	0.0025085		0.00427226	0.0128744	0.0183014	0.0253049	0.000387713	0.0543462	0.0264677	0.0653307	0.0151882	0.0366331
PE	4.41417	8.12737	6.71515	8.20236	5.34196	3.10693	4.53804	6.35946	6.86476	4.8366	1.77117	1.373		5.63467	7.19579	7.97508	7.5955	3.41332	3.59876	5.60048	3.26693	7.10026	3.96987	1.02756	1.09552		3.93338	7.20194	7.66405	9.56873	3.09295	4.03148	4.05879	6.44677	7.09203	4.4075	2.34168	1.43174		7.31417	8.32789	10.0178	9.3834	9.15482	9.75445	5.61798	7.79983	8.76082	8.08177
Chol	26.3947	24.472	24.6167	23.2966	7.68281	8.70875	7.05618	6.10675	24.695	7.38862	1.27804	1.09286		24.207	23.0487	22.7396	23.4622	6.76409	6.15316	16.7117	9.5634	23.3644	9.79809	0.634967	4.84232		29.7989	25.5948	25.6767	23.1743	16.0014	7.22038	6.86572	7.3131	26.0612	9.35016	2.74893	4.43837		25.94	28.0661	23.9125	24.1732	7.60962	12.8533	18.1375	9.15415	25.523	11.9387
Chol ester	3.31493	0.736903	0.563008	0.452108	0.746547	0.660052	0.776401	0.346555	1.26674	0.632389	1.37048	0.19684		5.06279	1.20361	0.748845	0.664528	1.16635	0.746306	0.440456	0.623185	1.91994	0.744075	2.10857	0.308286		1.3527	0.652284	0.388313	0.41137	0.956132	0.579019	0.213361	0.217365	0.701168	0.491469	0.450462	0.35405		1.83959	0.57186	0.59471	0.524805	0.761726	0.378917	1.57871	0.300389	0.882741	0.754935
PA	0.108913	0.103383	0.141506	0.116219	0.171822	0.148615	0.0807904	0.187946	0.117505	0.147293	0.0168417	0.047183		0.0967245	0.148047	0.116295	0.142884	0.152988	0.169125	0.335111	0.124882	0.125988	0.195527	0.0239608	0.0948351		0.117595	0.119428	0.0997764	0.0805025	0.0867894	0.155054	0.186998	0.392856	0.104326	0.205424	0.0181879	0.131759		0.0898873	0.0885992	0.0509969	0.0513785	0.0432613	0.175311	0.112604	0.254607	0.0702155	0.146446
PI	1.70539	2.50764	3.43388	3.25196	5.29283	5.6906	3.88917	8.83207	2.72472	5.92617	0.788888	2.08569		1.79868	3.53483	2.93907	3.58953	4.07534	4.8139	6.14752	5.55953	2.96553	5.14907	0.831808	0.900116		1.80093	3.42026	3.645	3.34834	4.51397	6.18092	6.34056	11.7337	3.05363	7.1923	0.844638	3.13829		1.74753	3.16728	2.6342	2.86346	4.46742	6.6746	8.78329	10.6861	2.60312	7.65285
	p value, paired two-tailed t-test
	WT vs ∆SMS1/2		SMS2 vs SMS2M64R
	WC	ER	WC	ER
SM	9.07824e-05	0.00159341	0.00355643	0.000102154
PC	0.00146341	0.786236	0.000668709	0.0400855
GSL	0.000367488	0.218973	0.221618	0.979161
DAG	0.956059	0.324935	0.0579448	0.0665887
Cer	0.70324	0.386797	0.170886	0.0541802
PS	0.641802	0.483151	0.0217869	0.957785
CerP	0.0559467	0.129097	0.551909	0.0865449
PE	0.71374	0.443804	0.119064	0.0643994
Chol	0.0843099	0.442214	0.728609	0.576247
Chol ester	0.175957	0.544959	0.221515	0.531084
PA	0.639458	0.5445	0.00619378	0.171519
PI	0.500208	0.544961	0.117193	0.574787
[truncated: 2 more columns]

## Sheet: Fig. 3E
	ER: PC species in order of double bonds											ER: # double bonds in PC species												ER: PC species in order of carbons											ER: # carbons in PC species
		SMS2					SMS2M64R						SMS2					SMS2M64R							SMS2					SMS2M64R						SMS2					SMS2M64R
		Rep 1	Rep 2	Rep 3	Rep 4		Rep 1	Rep 2	Rep 3	Rep 4		# double bonds	Rep 1	Rep 2	Rep 3	Rep 4		Rep 1	Rep 2	Rep 3	Rep 4				Rep 1	Rep 2	Rep 3	Rep 4		Rep 1	Rep 2	Rep 3	Rep 4		# carbons	Rep 1	Rep 2	Rep 3	Rep 4		Rep 1	Rep 2	Rep 3	Rep 4
	PC 28:0	0	0.0597817	0.0453513	0.022796		0.0734281	0.107987	0.0732847	0.068114		0	4.36894	7.24317	4.38685	3.54566		2.6005	3.52557	1.97818	2.16466														28	0	0.0597817	0.0453513	0.022796		0.0734281	0.107987	0.0732847	0.068114
	PC 30:0	0.87764	1.9657	1.1549	0.945684		1.0195	1.43874	0.947943	1.03839		1	20.3086	26.3343	24.9043	20.7083		16.2491	16.3362	13.3763	15.5724			PC 28:0	0	0.0597817	0.0453513	0.022796		0.0734281	0.107987	0.0732847	0.068114		30	1.02023	2.40853	1.49344	1.22083		1.4723	1.96554	1.32486	1.46342
	PC 32:0	3.20723	4.53344	2.77607	2.24919		1.3418	1.72329	0.765254	0.839673		2	19.4449	19.4555	22.9706	19.4842		20.533	15.0787	15.991	17.9238				0	0.0597817	0.0453513	0.022796		0.0734281	0.107987	0.0732847	0.068114		32	8.81106	12.4689	9.71491	8.04163		7.22504	7.22868	5.30447	6.02895
	PC 34:0	0	0	0	0		0	0	0	0		3	4.82788	5.2659	6.38991	5.66794		6.09689	4.03376	4.39845	4.51626														34	23.5434	26.4067	25.954	21.9348		19.1037	16.772	15.0651	17.2968
	PC 36:0	0.284068	0.684235	0.410533	0.327989		0.165774	0.255547	0.191701	0.218483		4	3.19307	3.27333	3.47446	3.30371		2.76456	2.43278	2.22356	2.48971			PC 30:2	0.0116098	0.0104311	0.0224343	0.0105762		0.00182015	0.067677	0.00816734	0.00477239		36	17.9861	18.8714	22.7107	19.5992		18.4538	14.037	14.4415	16.0769
	PC 38:0	0	0	0	0		0	0	0	0		5	4.57338	2.77646	3.35131	3.21752		2.62157	2.24515	1.98867	2.18584			PC 30:1	0.130983	0.43239	0.316106	0.264568		0.450977	0.459116	0.368749	0.420266		38	4.87064	3.79775	4.98693	4.59794		4.13573	3.20723	3.24345	3.50031
		4.36894	7.24317	4.38685	3.54566		2.6005	3.52557	1.97818	2.16466		6	0.643321	0.269127	0.600774	0.616944		0.721744	0.472973	0.304312	0.266055			PC 30:0	0.87764	1.9657	1.1549	0.945684		1.0195	1.43874	0.947943	1.03839		40	1.19727	0.619045	1.2739	1.22809		1.34357	0.786794	0.686587	0.575531
												>6	0.608869	0.913206	0.814914	0.803685		0.960361	0.802841	0.791214	0.805148				1.02023	2.40853	1.49344	1.22083		1.4723	1.96554	1.32486	1.46342		42	0.0126753	0.266042	0.171088	0.198438		0.0998648	0.231514	0.220642	0.194857
	PC 30:1	0.130983	0.43239	0.316106	0.264568		0.450977	0.459116	0.368749	0.420266			57.969	65.5309	66.8931	57.348		52.5477	44.9279	41.0518	45.9238														44	0.527671	0.632822	0.543313	0.504294		0.640279	0.591191	0.691826	0.718926
	PC 32:1	5.05809	6.70853	5.93602	4.94411		4.80689	4.49642	3.7027	4.27709														PC 32:4	0	0.00499097	0	0		0	0	0	0			57.969	65.5309	66.8937	57.348		52.5477	44.9279	41.0518	45.9238
	PC 34:1	15.1196	17.9844	17.2814	14.428		10.9913	10.7247	9.1088	10.6003														PC 32:3	0	0.197699	0.134796	0.114977		0.128332	0.181264	0.121483	0.102009
	PC 36:1	0	0.83793	0.974945	0.733235		0	0.524334	0.0539316	0.139186		ER: # double bonds in PC species expressed as fraction of total												PC 32:2	0.545735	1.02424	0.868023	0.733356		0.948021	0.827695	0.715028	0.810171
	PC 38:1	0	0.370986	0.395842	0.33845		0	0.131578	0.130629	0.132087			SMS2					SMS2M64R						PC 32:1	5.05809	6.70853	5.93602	4.94411		4.80689	4.49642	3.7027	4.27709			# carbons in PC species expressed as fraction of total
	PC 40:1	0	0	0	0		0	0	0.00190617	0.00100127		# double bonds	Rep 1	Rep 2	Rep 3	Rep 4		Rep 1	Rep 2	Rep 3	Rep 4			PC 32:0	3.20723	4.53344	2.77607	2.24919		1.3418	1.72329	0.765254	0.839673			SMS2					SMS2M64R
		0	0	0	0		0	0	0.00960894	0.00241136		0	0.0753668	0.11053	0.06558	0.0618272		0.0494883	0.0784717	0.0481875	0.0471358				8.81106	12.4689	9.71491	8.04163		7.22504	7.22868	5.30447	6.02895		# carbons	Rep 1	Rep 2	Rep 3	Rep 4		Rep 1	Rep 2	Rep 3	Rep 4
		20.3086	26.3343	24.9043	20.7083		16.2491	16.3362	13.3763	15.5724		1	0.350336	0.40186	0.3723	0.3611		0.309226	0.363608	0.32584	0.339091														28	0	0.000912266	0.00067796	0.000397503		0.00139736	0.00240355	0.00178518	0.0014832
												2	0.335436	0.29689	0.343393	0.339753		0.390749	0.33562	0.389534	0.390294			PC 34:5	0.745312	0.161327	0.0848529	0.0941441		0.0519721	0.143044	0.0912481	0.166855		30	0.0175996	0.036754	0.0223256	0.0212881		0.0280182	0.0437487	0.0322729	0.0318663
	PC 30:2	0.0116098	0.0104311	0.0224343	0.0105762		0.00182015	0.067677	0.00816734	0.00477239		3	0.0832838	0.0803574	0.0955242	0.0988341		0.116026	0.089783	0.107144	0.0983425			PC 34:4	0.254372	0.586396	0.440712	0.398593		0.341117	0.429624	0.292611	0.385354		32	0.151996	0.190275	0.145229	0.140225		0.137495	0.160895	0.129214	0.131281
	PC 32:2	0.545735	1.02424	0.868023	0.733356		0.948021	0.827695	0.715028	0.810171		4	0.0550823	0.0499509	0.0519405	0.0576082		0.0526105	0.0541485	0.0541647	0.054214			PC 34:3	1.04093	1.22325	1.12466	1.00143		1.14894	0.808184	0.742773	0.787861		34	0.406137	0.402965	0.387989	0.382485		0.363549	0.373309	0.366979	0.376642
	PC 34:2	6.38319	6.45128	7.02241	6.01261		6.57042	4.66645	4.82969	5.35643		5	0.0788935	0.0423687	0.0500995	0.0561053		0.0498892	0.0499722	0.048443	0.047597			PC 34:2	6.38319	6.45128	7.02241	6.01261		6.57042	4.66645	4.82969	5.35643		36	0.310271	0.287977	0.339505	0.341759		0.351182	0.312433	0.351788	0.350078
	PC 36:2	11.9494	11.2676	14.198	12.0187		12.1388	8.74453	9.66536	10.8703		6	0.0110977	0.00410687	0.0089811	0.0107579		0.013735	0.0105274	0.0074129	0.0057934			PC 34:1	15.1196	17.9844	17.2814	14.428		10.9913	10.7247	9.1088	10.6003		38	0.0840215	0.0579535	0.0745501	0.0801762		0.0787042	0.0713862	0.0790087	0.0762198
	PC 38:2	0.553416	0.699766	0.810571	0.678611		0.869272	0.731478	0.758033	0.882134		>6	0.0105034	0.0139355	0.0121823	0.0140142		0.018276	0.0178695	0.0192736	0.0175322			PC 34:0	0	0	0	0		0	0	0	0		40	0.0206537	0.0094466	0.0190437	0.0214146		0.0255686	0.0175124	0.0167249	0.0125323
	PC 40:2	0	0.000367341	0.0460371	0.0268062		0.00470317	0.0388887	0	0															23.5434	26.4067	25.954	21.9348		19.1037	16.772	15.0651	17.2968		42	0.000218656	0.00405979	0.0025576	0.00346024		0.00190046	0.005153	0.00537472	0.00424304
	PC 42:2	0.00160752	0.00187195	0.00313985	0.00345565		0	0.00164667	0.00197468	0																									44	0.00910264	0.00965684	0.00812205	0.00879359		0.0121847	0.0131587	0.0168525	0.0156547
	PC 44:2	0	0	0	0		0	0.00032279	0.0127827	0		# double bonds	Average		Std		p value, paired two-tailed t-test							PC 36:6	0.0687365	0.0572689	0.116224	0.112786		0.115353	0.0826041	0.0674576	0.0486699
		19.4449	19.4555	22.9706	19.4842		20.533	15.0787	15.991	17.9238			SMS2	SMS2M64R	SMS2	SMS2M64R								PC 36:5	0.766864	0.836292	0.877449	0.862317		0.62342	0.585774	0.550511	0.620286
												0	0.0783261	0.0558208	0.0222153	0.0151312	0.0109306							PC 36:4	1.81425	2.0066	1.99976	1.8503		1.52611	1.44198	1.1543	1.35743		# carbons	Average		Std		p value, paired two-tailed t-test
	PC 32:3	0	0.197699	0.134796	0.114977		0.128332	0.181264	0.121483	0.102009		1	0.371399	0.334441	0.022199	0.0229646	0.00593972							PC 36:3	3.10281	3.18153	4.1338	3.69382		3.88441	2.40221	2.75826	2.82256			SMS2	SMS2M64R	SMS2	SMS2M64R
	PC 34:3	1.04093	1.22325	1.12466	1.00143		1.14894	0.808184	0.742773	0.787861		2	0.328868	0.376549	0.0215651	0.027291	0.000872316							PC 36:2	11.9494	11.2676	14.198	12.0187		12.1388	8.74453	9.66536	10.8703		28	0.000496932	0.00176732	0.000392471	0.000455598	0.00112618
	PC 36:3	3.10281	3.18153	4.1338	3.69382		3.88441	2.40221	2.75826	2.82256		3	0.0894999	0.102824	0.00904884	0.0113005	0.152634							PC 36:1	0	0.83793	0.974945	0.733235		0	0.524334	0.0539316	0.139186		30	0.0244918	0.0339765	0.00842259	0.00679095	0.00149367
	PC 38:3	0.684135	0.592418	0.826583	0.723268		0.804408	0.538742	0.660576	0.7093		4	0.0536455	0.0537844	0.00338253	0.000783102	0.944211							PC 36:0	0.284068	0.684235	0.410533	0.327989		0.165774	0.255547	0.191701	0.218483		32	0.156931	0.139721	0.0227464	0.0145478	0.0285152
	PC 40:3	0	0.0706169	0.158047	0.134437		0.13028	0.103364	0.115363	0.0945321		5	0.0568668	0.0489754	0.0157242	0.00115646	0.38477								17.9861	18.8714	22.7107	19.5992		18.4538	14.037	14.4415	16.0769		34	0.394894	0.37012	0.0114483	0.00593693	0.0488627
	PC 42:3	0	0.000378971	0.012022	0		0.00052101	0	0	0		6	0.00873588	0.00936718	0.00322255	0.00351261	0.81538																		36	0.319878	0.34137	0.0256512	0.0193043	0.0608401
	PC 44:3	0	0	0	0		0	0	0	0		>6	0.0126588	0.0182378	0.00166733	0.000754485	0.0141497							PC 38:7	0.0499214	0.0307918	0.10851	0.110154		0.102817	0.058292	0.0182855	0.00332313		38	0.0741753	0.0763298	0.0114927	0.00352445	0.653454
		4.82788	5.2659	6.38991	5.66794		6.09689	4.03376	4.39845	4.51626														PC 38:6	0	0	0	0		0	0	0	0		40	0.0176397	0.0180845	0.00555074	0.00544714	0.914053
																								PC 38:5	2.55805	1.52036	2.00924	1.96926		1.63389	1.30625	1.14946	1.26071		42	0.00257407	0.00416781	0.0016873	0.0015889	0.0379711
	PC 32:4	0	0.00499097	0	0		0	0	0	0														PC 38:4	1.02512	0.583427	0.836182	0.778197		0.72534	0.440891	0.526463	0.512754		44	0.00891878	0.0144627	0.000640052	0.00216194	0.026534
	PC 34:4	0.254372	0.586396	0.440712	0.398593		0.341117	0.429624	0.292611	0.385354														PC 38:3	0.684135	0.592418	0.826583	0.723268		0.804408	0.538742	0.660576	0.7093
	PC 36:4	1.81425	2.0066	1.99976	1.8503		1.52611	1.44198	1.1543	1.35743														PC 38:2	0.553416	0.699766	0.810571	0.678611		0.869272	0.731478	0.758033	0.882134
	PC 38:4	1.02512	0.583427	0.836182	0.778197		0.72534	0.440891	0.526463	0.512754														PC 38:1	0	0.370986	0.395842	0.33845		0	0.131578	0.130629	0.132087
	PC 40:4	0.0993213	0.0919188	0.195801	0.193097		0.171992	0.0915286	0.17793	0.14969														PC 38:0	0	0	0	0		0	0	0	0
	PC 42:4	0	0	0.00200589	0.0835297		0	0.0287544	0.0722556	0.0844848															4.87064	3.79775	4.98693	4.59794		4.13573	3.20723	3.24345	3.50031
		3.19307	3.27333	3.47446	3.30371		2.76456	2.43278	2.22356	2.48971
																								PC 40:7	0.0219807	0	0.0969177	0.11663		0.139975	0.0561614	0	0
	PC 34:5	0.745312	0.161327	0.0848529	0.0941441		0.0519721	0.143044	0.0912481	0.166855														PC 40:6	0.572813	0.197659	0.445317	0.465313		0.586278	0.287238	0.195969	0.192323
	PC 36:5	0.766864	0.836292	0.877449	0.862317		0.62342	0.585774	0.550511	0.620286														PC 40:5	0.503159	0.258483	0.331255	0.291803		0.310343	0.209614	0.195419	0.137985
	PC 38:5	2.55805	1.52036	2.00924	1.96926		1.63389	1.30625	1.14946	1.26071														PC 40:4	0.0993213	0.0919188	0.195801	0.193097		0.171992	0.0915286	0.17793	0.14969
	PC 40:5	0.503159	0.258483	0.331255	0.291803		0.310343	0.209614	0.195419	0.137985														PC 40:3	0	0.0706169	0.158047	0.134437		0.13028	0.103364	0.115363	0.0945321
	PC 42:5	0	0	0.0485139	0		0.00194035	0.000462309	0.00203053	0														PC 40:2	0	0.000367341	0.0460371	0.0268062		0.00470317	0.0388887	0	0
		4.57338	2.77646	3.35131	3.21752		2.62157	2.24515	1.98867	2.18584														PC 40:1	0	0	0	0		0	0	0.00190617	0.00100127
																								PC 40:0	0	0	0.000528061	0		0	0	0	0
	PC 36:6	0.0687365	0.0572689	0.116224	0.112786		0.115353	0.0826041	0.0674576	0.0486699															1.19727	0.619045	1.2739	1.22809		1.34357	0.786794	0.686587	0.575531
	PC 38:6	0	0	0	0		0	0	0	0
	PC 40:6	0.572813	0.197659	0.445317	0.465313		0.586278	0.287238	0.195969	0.192323														PC 42:11	0.00404506	0.0279605	0.0580641	0.0498872		0.0529133	0.079814	0.0938857	0.0823896
	PC 42:6	0.00177162	0.0141991	0.0392326	0.038845		0.0201139	0.103131	0.0408863	0.025062														PC 42:9	0.00371013	0.221631	0.00131806	0.0085395		0.00779611	0.0136107	0	0
		0.643321	0.269127	0.600774	0.616944		0.721744	0.472973	0.304312	0.266055														PC 42:8	0	0	0	0.00235684		0.00148203	0	0	0.000508979
																								PC 42:7	0.00154096	0	0.00679116	0.0118239		0.0150981	0.00409454	0	0
	PC 38:7	0.0499214	0.0307918	0.10851	0.110154		0.102817	0.058292	0.0182855	0.00332313														PC 42:6	0.00177162	0.0141991	0.0392326	0.038845		0.0201139	0.103131	0.0408863	0.025062
	PC 40:7	0.0219807	0	0.0969177	0.11663		0.139975	0.0561614	0	0														PC 42:5	0	0	0.0485139	0		0.00194035	0.000462309	0.00203053	0
	PC 42:7	0.00154096	0	0.00679116	0.0118239		0.0150981	0.00409454	0	0														PC 42:4	0	0	0.00200589	0.0835297		0	0.0287544	0.0722556	0.0844848
	PC 44:7	0	0	0	0		0	0.00032279	0.0127827	0														PC 42:3	0	0.000378971	0.012022	0		0.00052101	0	0	0
		0.0734431	0.0307918	0.212218	0.238608		0.25789	0.118871	0.0310682	0.00332313														PC 42:2	0.00160752	0.00187195	0.00313985	0.00345565		0	0.00164667	0.00197468	0
																								PC 42:1	0	0	0	0		0	0	0.00960894	0.00241136
	PC 42:8	0	0	0	0.00235684		0.00148203	0	0	0.000508979															0.0126753	0.266042	0.171088	0.198438		0.0998648	0.231514	0.220642	0.194857
	PC 44:8	0	0	0	0		0	0	0	0
		0	0	0	0.00235684		0.00148203	0	0	0.000508979														PC 44:11	0.482329	0.632822	0.512322	0.482465		0.589002	0.541895	0.666261	0.718926
																								PC 44:9	0.0453414	0	0.0309916	0.0218294		0.0512772	0.0486506	0	0
	PC 42:9	0.00371013	0.221631	0.00131806	0.0085395		0.00779611	0.0136107	0	0														PC 44:3	0	0	0	0		0	0	0	0
	PC 44:9	0.0453414	0	0.0309916	0.0218294		0.0512772	0.0486506	0	0														PC 44:2	0	0	0	0		0	0.00032279	0.0127827	0
		0.0490515	0.221631	0.0323096	0.0303689		0.0590733	0.0622614	0	0														PC 44:7	0	0	0	0		0	0.00032279	0.0127827	0
																								PC 44:8	0	0	0	0		0	0	0	0
	PC 44:11	0.482329	0.632822	0.512322	0.482465		0.589002	0.541895	0.666261	0.718926															0.527671	0.632822	0.543313	0.504294		0.640279	0.591191	0.691826	0.718926
	PC 42:11	0.00404506	0.0279605	0.0580641	0.0498872		0.0529133	0.079814	0.0938857	0.0823896
		0.486375	0.660783	0.570386	0.532352		0.641915	0.621709	0.760146	0.801315
Note	PC unsaturation in ER is part of Fig.4e
	PC chain length in ER is part of Fig.4e
