# Supplementary material for: Pathogenic variants of sphingomyelin synthase SMS2 disrupt lipid landscapes in the secretory pathway
Source: eLife. 2022 Sep 14;11:e79278. doi: 10.7554/eLife.79278 (PMC9531943; doi:10.7554/eLife.79278)
Supplement: Figure 4—source data 2. [file elife-79278-fig4-data2.xlsx]

## Sheet: Fig. 4C
					Lipid species expressed as mol% of total lipid analyzed
		WC						PM
		Rep 1	Rep 2	Rep 3	Rep 4	Rep 5		Rep 1	Rep 2	Rep 3	Rep 4	Rep 5
	SM	4.51735	4.62135	4.73356	5.26485	4.78737		10.3821	9.34366	8.89489	10.3418	10.4422
	Cer	0.309135	0.321604	0.316738	0.34905	0.296172		0.108314	0.03754	0.141682	0.189668	0.196637
	Cer/SM	0.0684328	0.0695909	0.0669132	0.0662982	0.0618652		0.0104328	0.0040177	0.0159285	0.0183399	0.018831
	Chol	18.5735	21.4942	21.696	16.0479	15.0767		41.8592	44.1711	35.0653	34.0608	33.4871
	PG	0.33413	0.452849	0.504144	0.280684	0.308082		0.063427	0.00237533	0.0332507	0.0309548	0.0182096
	PS	1.55476	1.58554	1.79901	1.24306	1.45468		2.98357	3.16776	2.84372	4.24812	4.53539
	CL	0.552623	0.47505	0.820038	3.4201	2.80431		0	0	0	0	0.00288416
		Average		STD		p value, paired two-tailed t-test
		WC	PM	WC	PM
	SM	4.7849	9.88093	0.287803	0.714065	4.27351e-07
	Cer	0.31854	0.134768	0.0195722	0.0652738	0.00031272
	Cer/SM	0.0666201	0.01351	0.00295422	0.00626625	1.36345e-07
	Chol	18.5777	37.7287	3.03672	4.92707	7.62727e-05
	PG	0.375978	0.0296435	0.0971826	0.0225297	5.41918e-05
	PS	1.52741	3.55571	0.202506	0.778457	0.000487887
	CL	1.61443	0.000576833	1.39041	0.00128984	0.0318445
	Note- data in 4c are part of 4d

## Sheet: Fig. 4D
					Lipid species expressed as mol% of total lipid analyzed
	WT															∆SMS1/2															SMS2															SMS2M64R
	WC					PM					Average		Std			WC					PM					Average		Std			WC					PM					Average		Std			WC
	Replicate 1	Replicate 2	Replicate 3	Replicate 4	Replicate 5	Replicate 1	Replicate 2	Replicate 3	Replicate 4	Replicate 5	WC	PM	WC	PM		Replicate 1	Replicate 2	Replicate 3	Replicate 4	Replicate 5	Replicate 1	Replicate 2	Replicate 3	Replicate 4	Replicate 5	WC	PM	WC	PM		Replicate 1	Replicate 2	Replicate 3	Replicate 4	Replicate 5	Replicate 1	Replicate 2	Replicate 3	Replicate 4	Replicate 5	WC	PM	WC	PM		Replicate 1	Replicate 2	Replicate 3	Replicate 4
SM	4.51735	4.62135	4.73356	5.26485	4.78738	10.3821	9.34366	8.89489	10.3418	10.4422	4.7849	9.88093	0.287803	0.714064		0.490649	0.275342	0.285753	0.303724	0.253666	0.739613	0.777897	0.660278	0.645	0.678739	0.321827	0.700305	0.0960946	0.0563283		4.40066	5.28629	5.58965	4.98443	5.42762	9.17916	9.81591	9.29608	10.6545	9.98478	5.13773	9.78609	0.468272	0.592246		6.42167	6.60936	6.37632	8.96421
Chol	18.5735	21.4942	21.696	16.0479	15.0767	41.8592	44.1711	35.0653	34.0608	33.4871	18.5777	37.7287	3.03672	4.92707		23.2555	21.9433	25.5301	19.0241	16.6168	46.6612	41.2809	44.6133	41.325	41.4936	21.274	43.0748	3.50858	2.44995		23.7947	25.5591	28.493	19.0241	19.6323	50.3923	52.5848	43.7651	36.6472	38.4578	23.3006	44.3694	4.00159	7.04826		24.2818	23.5123	24.5296	18.1762
GSL	0.799319	0.58047	0.837133	3.08097	2.87746	1.45323	1.42096	1.66443	1.83104	2.11935	1.63507	1.69781	1.23304	0.288542		2.10441	1.82757	2.32311	4.15439	4.60814	3.64507	3.5333	3.62068	2.34102	1.97902	3.00352	3.02382	1.27999	0.799934		1.46821	1.50923	1.45553	3.87887	3.4062	3.63024	2.50696	2.7288	2.27081	2.43914	2.34361	2.71519	1.19764	0.537247		1.6408	1.52352	1.56297	2.90839
PC	36.6646	40.5684	37.9939	40.2421	36.8482	21.9964	19.8784	23.7825	20.6582	20.4374	38.4635	21.3506	1.84795	1.56621		45.8599	44.3778	45.0434	45.2962	47.1433	30.4819	35.198	27.7909	27.9908	28.5411	45.5441	30.0005	1.04037	3.09425		36.9607	40.8865	37.2149	35.6546	39.6431	15.3144	18.2828	18.094	22.084	19.8899	38.072	18.733	2.13328	2.49328		36.0362	33.7857	30.1937	34.266
Cer	0.309135	0.321604	0.316738	0.34905	0.296172	0.108314	0.0375397	0.141682	0.189668	0.196637	0.31854	0.134768	0.0195721	0.0652739		0.420097	0.335731	0.400868	0.377849	0.327698	0.229576	0.273505	0.204281	0.275587	0.228031	0.372449	0.242196	0.040181	0.0311956		0.163584	0.177116	0.233915	0.286111	0.303471	0.0270942	0.0746599	0.154546	0.278873	0.335725	0.232839	0.17418	0.0627082	0.131322		0.154713	0.138444	0.200842	0.155112
PE	13.0094	7.29424	9.65197	9.58166	12.8244	4.13063	4.37635	5.71134	4.79314	4.46371	10.4723	4.69504	2.42566	0.615655		5.52624	8.80893	5.31882	8.68407	10.2254	2.04877	1.72373	2.66107	3.78342	3.44739	7.71269	2.73288	2.17774	0.881152		9.83903	5.4796	5.40683	10.8186	8.25321	1.7979	1.53195	4.32894	3.04805	3.65193	7.95946	2.87175	2.47283	1.19493		8.90067	11.1092	11.2783	12.416
DAG	0.732919	0.331836	0.780827	0.942721	0.871768	0.446758	1.37266	1.05039	1.59376	2.25232	0.732014	1.34318	0.237936	0.666989		1.59084	1.18447	1.78684	1.8589	1.72567	0.295909	0.938811	0.801214	1.93285	1.34976	1.62934	1.06371	0.267476	0.614665		0.777983	1.00647	1.32048	1.35166	1.06927	3.45996	0.542354	0.726785	2.49883	2.52409	1.10517	1.9504	0.237276	1.26377		0.824959	0.675798	1.74209	1.43974
PI	3.61936	4.35059	3.87566	2.37017	2.80744	1.20924	1.42414	1.91835	2.65089	2.37495	3.40464	1.91551	0.804606	0.610765		2.39286	1.97254	3.19845	3.03716	2.77427	0.98657	2.05338	1.3942	1.53281	1.81334	2.67506	1.55606	0.497011	0.40761		2.70771	2.56442	3.59538	3.42642	2.84182	0.850837	0.363272	1.04276	1.81542	2.51109	3.02715	1.31668	0.456294	0.847998		3.69718	3.52165	3.74531	4.15976
PS	1.55476	1.58554	1.79901	1.24306	1.45468	2.98357	3.16776	2.84372	4.24812	4.53539	1.52741	3.55571	0.202506	0.778457		1.24728	1.40106	1.4046	1.69518	1.61072	2.96557	3.13023	3.37971	3.70708	4.28874	1.47177	3.49427	0.179669	0.524797		1.48459	1.45531	1.57157	2.11725	1.63995	3.55826	3.12556	2.83265	3.38441	3.97017	1.65373	3.37421	0.269154	0.431352		1.65777	1.48103	1.64145	1.73895
Chol ester	1.46934	1.61907	1.42396	1.6169	1.33322	0.4743	1.45614	1.79274	1.08893	2.80682	1.4925	1.52379	0.124601	0.86799		3.60008	3.20913	2.70544	2.13735	1.84205	0.44953	0.420856	1.76433	1.8509	1.21209	2.69881	1.13954	0.728359	0.688164		1.19716	1.26542	0.927685	1.37185	1.30094	0.241409	0.411145	0.324753	0.808367	0.78249	1.21261	0.513633	0.171297	0.264309		1.4275	1.44257	2.26256	0.992623
	p value, paired two-tailed t-test
	WT vs ∆SMS1/2		SMS2 vs SMS2M64R
	WC	PM	WC	PM
SM	7.84931e-06	9.16925e-06	0.0230845	0.14195
Chol	0.024344	0.07173	0.137263	0.0331533
GSL	0.000257446	0.0503007	0.661297	0.917135
PC	0.00434257	0.0093919	0.0358212	0.216295
Cer	0.0438519	0.0383818	0.0600073	0.61612
PE	0.144739	0.00926669	0.0766885	0.896634
DAG	7.11699e-06	0.237769	0.435262	0.814212
PI	0.233061	0.27768	0.00886889	0.387963
PS	0.742015	0.745412	0.755388	0.907424
Chol ester	0.018316	0.407791	0.472742	0.450181
[truncated: 10 more columns]

## Sheet: Fig. 4E
					Lipid species expressed as mol% of total lipid analyzed
	WT															∆SMS1/2															SMS2															SMS2M64R
	WC					PM					Average		Std			WC					PM					Average		Std			WC					PM					Average		Std			WC
	Replicate 1	Replicate 2	Replicate 3	Replicate 4	Replicate 5	Replicate 1	Replicate 2	Replicate 3	Replicate 4	Replicate 5	WC	PM	WC	PM		Replicate 1	Replicate 2	Replicate 3	Replicate 4	Replicate 5	Replicate 1	Replicate 2	Replicate 3	Replicate 4	Replicate 5	WC	PM	WC	PM		Replicate 1	Replicate 2	Replicate 3	Replicate 4	Replicate 5	Replicate 1	Replicate 2	Replicate 3	Replicate 4	Replicate 5	WC	PM	WC	PM		Replicate 1	Replicate 2	Replicate 3	Replicate 4
SM	4.51735	4.62135	4.73356	5.26485	4.78738	10.3821	9.34366	8.89489	10.3418	10.4422	4.7849	9.88093	0.287803	0.714064		0.490649	0.275342	0.285753	0.303724	0.253666	0.739613	0.777897	0.660278	0.645	0.678739	0.321827	0.700305	0.0960946	0.0563283		4.40066	5.28629	5.58965	4.98443	5.42762	9.17916	9.81591	9.29608	10.6545	9.98478	5.13773	9.78609	0.468272	0.592246		6.42167	6.60936	6.37632	8.96421
Chol	18.5735	21.4942	21.696	16.0479	15.0767	41.8592	44.1711	35.0653	34.0608	33.4871	18.5777	37.7287	3.03672	4.92707		23.2555	21.9433	25.5301	19.0241	16.6168	46.6612	41.2809	44.6133	41.325	41.4936	21.274	43.0748	3.50858	2.44995		23.7947	25.5591	28.493	19.0241	19.6323	50.3923	52.5848	43.7651	36.6472	38.4578	23.3006	44.3694	4.00159	7.04826		24.2818	23.5123	24.5296	18.1762
GSL	0.799319	0.58047	0.837133	3.08097	2.87746	1.45323	1.42096	1.66443	1.83104	2.11935	1.63507	1.69781	1.23304	0.288542		2.10441	1.82757	2.32311	4.15439	4.60814	3.64507	3.5333	3.62068	2.34102	1.97902	3.00352	3.02382	1.27999	0.799934		1.46821	1.50923	1.45553	3.87887	3.4062	3.63024	2.50696	2.7288	2.27081	2.43914	2.34361	2.71519	1.19764	0.537247		1.6408	1.52352	1.56297	2.90839
PC	36.6646	40.5684	37.9939	40.2421	36.8482	21.9964	19.8784	23.7825	20.6582	20.4374	38.4635	21.3506	1.84795	1.56621		45.8599	44.3778	45.0434	45.2962	47.1433	30.4819	35.198	27.7909	27.9908	28.5411	45.5441	30.0005	1.04037	3.09425		36.9607	40.8865	37.2149	35.6546	39.6431	15.3144	18.2828	18.094	22.084	19.8899	38.072	18.733	2.13328	2.49328		36.0362	33.7857	30.1937	34.266
Cer	0.309135	0.321604	0.316738	0.34905	0.296172	0.108314	0.0375397	0.141682	0.189668	0.196637	0.31854	0.134768	0.0195721	0.0652739		0.420097	0.335731	0.400868	0.377849	0.327698	0.229576	0.273505	0.204281	0.275587	0.228031	0.372449	0.242196	0.040181	0.0311956		0.163584	0.177116	0.233915	0.286111	0.303471	0.0270942	0.0746599	0.154546	0.278873	0.335725	0.232839	0.17418	0.0627082	0.131322		0.154713	0.138444	0.200842	0.155112
PE	13.0094	7.29424	9.65197	9.58166	12.8244	4.13063	4.37635	5.71134	4.79314	4.46371	10.4723	4.69504	2.42566	0.615655		5.52624	8.80893	5.31882	8.68407	10.2254	2.04877	1.72373	2.66107	3.78342	3.44739	7.71269	2.73288	2.17774	0.881152		9.83903	5.4796	5.40683	10.8186	8.25321	1.7979	1.53195	4.32894	3.04805	3.65193	7.95946	2.87175	2.47283	1.19493		8.90067	11.1092	11.2783	12.416
DAG	0.732919	0.331836	0.780827	0.942721	0.871768	0.446758	1.37266	1.05039	1.59376	2.25232	0.732014	1.34318	0.237936	0.666989		1.59084	1.18447	1.78684	1.8589	1.72567	0.295909	0.938811	0.801214	1.93285	1.34976	1.62934	1.06371	0.267476	0.614665		0.777983	1.00647	1.32048	1.35166	1.06927	3.45996	0.542354	0.726785	2.49883	2.52409	1.10517	1.9504	0.237276	1.26377		0.824959	0.675798	1.74209	1.43974
PI	3.61936	4.35059	3.87566	2.37017	2.80744	1.20924	1.42414	1.91835	2.65089	2.37495	3.40464	1.91551	0.804606	0.610765		2.39286	1.97254	3.19845	3.03716	2.77427	0.98657	2.05338	1.3942	1.53281	1.81334	2.67506	1.55606	0.497011	0.40761		2.70771	2.56442	3.59538	3.42642	2.84182	0.850837	0.363272	1.04276	1.81542	2.51109	3.02715	1.31668	0.456294	0.847998		3.69718	3.52165	3.74531	4.15976
PS	1.55476	1.58554	1.79901	1.24306	1.45468	2.98357	3.16776	2.84372	4.24812	4.53539	1.52741	3.55571	0.202506	0.778457		1.24728	1.40106	1.4046	1.69518	1.61072	2.96557	3.13023	3.37971	3.70708	4.28874	1.47177	3.49427	0.179669	0.524797		1.48459	1.45531	1.57157	2.11725	1.63995	3.55826	3.12556	2.83265	3.38441	3.97017	1.65373	3.37421	0.269154	0.431352		1.65777	1.48103	1.64145	1.73895
Chol ester	1.46934	1.61907	1.42396	1.6169	1.33322	0.4743	1.45614	1.79274	1.08893	2.80682	1.4925	1.52379	0.124601	0.86799		3.60008	3.20913	2.70544	2.13735	1.84205	0.44953	0.420856	1.76433	1.8509	1.21209	2.69881	1.13954	0.728359	0.688164		1.19716	1.26542	0.927685	1.37185	1.30094	0.241409	0.411145	0.324753	0.808367	0.78249	1.21261	0.513633	0.171297	0.264309		1.4275	1.44257	2.26256	0.992623
	p value, paired two-tailed t-test
	WT vs ∆SMS1/2		SMS2 vs SMS2M64R
	WC	PM	WC	PM
SM	7.84931e-06	9.16925e-06	0.0230845	0.14195
Chol	0.024344	0.07173	0.137263	0.0331533
GSL	0.000257446	0.0503007	0.661297	0.917135
PC	0.00434257	0.0093919	0.0358212	0.216295
Cer	0.0438519	0.0383818	0.0600073	0.61612
PE	0.144739	0.00926669	0.0766885	0.896634
DAG	7.11699e-06	0.237769	0.435262	0.814212
PI	0.233061	0.27768	0.00886889	0.387963
PS	0.742015	0.745412	0.755388	0.907424
Chol ester	0.018316	0.407791	0.472742	0.450181
[truncated: 10 more columns]
