# Supplementary material for: Pathogenic variants of sphingomyelin synthase SMS2 disrupt lipid landscapes in the secretory pathway
Source: eLife. 2022 Sep 14;11:e79278. doi: 10.7554/eLife.79278 (PMC9531943; doi:10.7554/eLife.79278)
Supplement: Figure 7—source data 1. [file elife-79278-fig7-data1.xlsx]

## Sheet: Fig. 7C
	NR12A Ratio distribution table
		Cumulated Intensities						Normalized to max
	Ratio	Wild type	∆SMS1/2	SMS2	SMS2M64R				Wild type	∆SMS1/2	SMS2	SMS2M64R
	0	0	0	0	0			0	0	0	0	0
	0.05	12046	0	0	0			0.05	0.000139394	0	0	0
	0.1	0	427905	0	129665			0.1	0	0.00293732	0	0.00103817
	0.15	19225	5698491	74889	2332641			0.15	0.000222469	0.0391168	0.000847617	0.0186764
	0.2	29875	39437487	205283	4726369			0.2	0.000345709	0.270715	0.00232346	0.0378418
	0.25	75858	114185962	589162	8814541			0.25	0.000877817	0.78382	0.00666832	0.0705739
	0.3	153894	145678879	1958486	26582512			0.3	0.00178084	1	0.0221668	0.212834
	0.35	247418	119776524	5004621	57698196			0.35	0.00286308	0.822196	0.0566439	0.461962
	0.4	352057	79144815	14692198	99626475			0.4	0.00407395	0.543283	0.166291	0.797662
	0.45	622869	47512452	29709868	124898054			0.45	0.00720774	0.326145	0.336266	1
	0.5	1204274	27233570	49731464	118755885			0.5	0.0139357	0.186942	0.562876	0.950823
	0.55	2096991	14626342	63302710	85228286			0.55	0.0242661	0.100401	0.71648	0.682383
	0.6	3959419	8463752	77924172	55704105			0.6	0.0458178	0.0580987	0.88197	0.445997
	0.65	6684055	3277357	87673814	33509404			0.65	0.0773469	0.0224971	0.99232	0.268294
	0.7	10466240	1532283	88352390	19026966			0.7	0.121114	0.0105182	1	0.15234
	0.75	16840666	1255912	81888358	9302359			0.75	0.194878	0.0086211	0.926838	0.0744796
	0.8	26256116	282562	67144505	5267018			0.8	0.303832	0.00193962	0.759963	0.0421705
	0.85	38546438	124655	58204517	3383233			0.85	0.446053	0.000855683	0.658777	0.027088
	0.9	57847788	52334	52490466	1623763			0.9	0.669406	0.000359242	0.594104	0.0130007
	0.95	86416629	40539	13564027	1049681			0.95	1	0.000278276	0.153522	0.0084043
	1	85203636	20061	6415689	471162			1	0.985963	0.000137707	0.0726148	0.00377237
	1.05	71644762	0	3302394	445777			1.05	0.829062	0	0.0373775	0.00356913
	1.1	66784473	16148	2107378	183827			1.1	0.77282	0.000110847	0.023852	0.00147182
	1.15	51200225	6722	856642	151845			1.15	0.592481	4.61426e-05	0.00969574	0.00121575
	1.2	46515135	0	613872	172193			1.2	0.538266	0	0.006948	0.00137867
	1.25	37105467	0	330760	100175			1.25	0.429379	0	0.00374365	0.000802054
	1.3	29978193	0	247218	74163			1.3	0.346903	0	0.00279809	0.000593788
	1.35	22755479	0	176878	12882			1.35	0.263323	0	0.00200196	0.00010314
	1.4	17649063	0	129321	25411			1.4	0.204232	0	0.0014637	0.000203454
	1.45	15478727	0	38101	21096			1.45	0.179117	0	0.000431239	0.000168906
	1.5	13299842	0	28985	28683			1.5	0.153904	0	0.000328061	0.000229651
	1.55	10225457	0	114870	6477			1.55	0.118327	0	0.00130013	5.18583e-05
	1.6	8670928	0	13680	0			1.6	0.100339	0	0.000154835	0
	1.65	8083814	0	34057	0			1.65	0.0935447	0	0.000385468	0
	1.7	5935671	0	0	0			1.7	0.0686867	0	0	0
	1.75	5135860	0	0	0			1.75	0.0594314	0	0	0
	1.8	4212930	0	25752	0			1.8	0.0487514	0	0.000291469	0
	1.85	3866704	0	0	0			1.85	0.0447449	0	0	0
	1.9	3173614	0	0	0			1.9	0.0367246	0	0	0
	1.95	0	0	0	0			1.95	0	0	0	0
	2	0	0	0	0			2	0	0	0	0
	Max	86416629	145678879	88352390	124898054

## Sheet: Fig. 7D
	Wild type	∆SMS1/2	SMS2	SMS2M64R			Wild type	∆SMS1/2	SMS2	SMS2M64R
cell 1	1.251	0.413	0.633	0.609		Average	1.1733	0.4322	0.7749	0.5358
cell 2	1.053	0.37	0.877	0.467		Std	0.150236	0.0344898	0.107747	0.0435854
cell 3	1.132	0.384	0.739	0.573
cell 4	1.268	0.488	0.634	0.542
cell 5	1.123	0.387	0.892	0.512			p value, unpaired two tailed test
cell 6	1.179	0.462	0.964	0.594		WT v ∆SMS1/2	5.93474e-34
cell 7	1.254	0.46	0.715	0.551		SMS2 v SMS2M64R	3.09897e-16
cell 8	1.226	0.445	0.607	0.426
cell 9	1.416	0.468	0.813	0.481
cell 10	1.447	0.482	0.783	0.537
cell 11	1.283	0.438	0.793	0.5
cell 12	1.481	0.474	0.757	0.561
cell 13	0.966	0.394	0.704	0.49
cell 14	0.936	0.407	0.662	0.577
cell 15	0.943	0.445	0.699	0.549
cell 16	1.415	0.419	0.735	0.535
cell 17	1.171	0.439	0.699	0.542
cell 18	1.37	0.439	0.977	0.612
cell 19	0.979	0.434	0.763	0.569
cell 20	1.002	0.39	0.622	0.511
cell 21	1.048	0.391	0.734	0.507
cell 22	1.143	0.392	0.705	0.498
cell 23	1.143	0.395	0.777	0.574
cell 24	1.146	0.401	0.751	0.504
cell 25	1.096	0.455	0.832	0.498
cell 26	1.149	0.461	0.787	0.562
cell 27	1.145	0.482	0.781	0.499
cell 28	1.171	0.467	0.94	0.563
cell 29	1.244	0.432	0.845	0.575
cell 30	1.019	0.452	1.027	0.556

## Sheet: Fig. 7E
	NRERcl Ratio distribution table
		Cumulated Intensities						Normalized to max
	Ratio	Wild type	∆SMS1/2	SMS2	SMS2M64R				Wild type	∆SMS1/2	SMS2	SMS2M64R
	0	0	0	0	0			0	0	0	0	0
	0.05	0	0	0	0			0.05	0	0	0	0
	0.1	0	0	0	0			0.1	0	0	0	0
	0.15	0	262325	41490	0			0.15	0	0.000978788	0.000358362	0
	0.2	911424	23324560	2127797	0			0.2	0.0313926	0.0870287	0.0183784	0
	0.25	11371771	161588803	25292278	19695			0.25	0.391684	0.602921	0.218457	0.000381341
	0.3	29033048	268009955	84294115	523528			0.3	1	1	0.728074	0.0101367
	0.35	25198535	207165737	115776910	5798557			0.35	0.867926	0.772978	1	0.112273
	0.4	16188926	104892452	93171676	25629544			0.4	0.557603	0.391375	0.804752	0.496247
	0.45	9410485	54011812	57140851	46207156			0.45	0.32413	0.201529	0.493543	0.894677
	0.5	4816508	33340998	30997943	51646741			0.5	0.165897	0.124402	0.267739	1
	0.55	2643485	24119321	19792541	41246866			0.55	0.0910509	0.0899941	0.170954	0.798634
	0.6	1283165	16306200	10264400	30285167			0.6	0.0441967	0.0608418	0.0886567	0.586391
	0.65	711778	11437559	5826504	20823124			0.65	0.0245161	0.0426759	0.0503253	0.403184
	0.7	610174	7559452	2693751	11310131			0.7	0.0210165	0.0282059	0.0232667	0.21899
	0.75	286584	5847710	1728116	8761290			0.75	0.00987096	0.021819	0.0149263	0.169639
	0.8	197512	4106333	599430	6129067			0.8	0.00680301	0.0153216	0.00517746	0.118673
	0.85	145690	3289806	341939	4060259			0.85	0.00501807	0.0122749	0.00295343	0.078616
	0.9	183796	2504440	327029	3057720			0.9	0.00633058	0.00934458	0.00282465	0.0592045
	0.95	52230	1461288	31258	2129735			0.95	0.00179898	0.00545236	0.000269985	0.0412366
	1	0	0	0	0			1	0	0	0	0
	Max	29033048	268009955	115776910	51646741

## Sheet: Fig. 7F
	Wild type	∆SMS1/2	SMS2	SMS2M64R			Wild type	∆SMS1/2	SMS2	SMS2M64R
cell 1	0.321	0.341	0.396	0.488		Average	0.348	0.353233	0.399833	0.501133
cell 2	0.367	0.374	0.404	0.476		std	0.013844	0.0130825	0.0225038	0.0423595
cell 3	0.358	0.356	0.416	0.496
cell 4	0.359	0.374	0.394	0.507
cell 5	0.359	0.387	0.405	0.517			p value, unpaired two tailed test
cell 6	0.36	0.367	0.395	0.487		WT v ∆SMS1/2	0.137782
cell 7	0.326	0.354	0.417	0.497		SMS2 v SMS2M64R	1.07141e-16
cell 8	0.331	0.347	0.395	0.495
cell 9	0.325	0.366	0.417	0.525
cell 10	0.327	0.358	0.395	0.548
cell 11	0.336	0.361	0.416	0.477
cell 12	0.339	0.342	0.402	0.452
cell 13	0.365	0.341	0.411	0.481
cell 14	0.348	0.347	0.435	0.497
cell 15	0.345	0.353	0.413	0.522
cell 16	0.335	0.35	0.412	0.48
cell 17	0.353	0.364	0.414	0.483
cell 18	0.347	0.355	0.399	0.463
cell 19	0.347	0.356	0.394	0.477
cell 20	0.33	0.358	0.402	0.477
cell 21	0.341	0.36	0.402	0.508
cell 22	0.361	0.352	0.401	0.496
cell 23	0.36	0.355	0.336	0.54
cell 24	0.355	0.336	0.343	0.445
cell 25	0.349	0.343	0.339	0.565
cell 26	0.366	0.339	0.412	0.548
cell 27	0.364	0.335	0.407	0.569
cell 28	0.35	0.334	0.402	0.442
cell 29	0.358	0.332	0.415	0.441
cell 30	0.358	0.36	0.406	0.635
