# Supplementary material for: Pathogenic variants of sphingomyelin synthase SMS2 disrupt lipid landscapes in the secretory pathway
Source: eLife. 2022 Sep 14;11:e79278. doi: 10.7554/eLife.79278 (PMC9531943; doi:10.7554/eLife.79278)
Supplement: Figure 8—source data 1. [file elife-79278-fig8-data1.xlsx]

## Sheet: Fig. 8C
		Rep 1	Plate reader values																											Rep 2	Plate reader values
		mβCD	WT				∆SMS1/2				SMS2				SMS2I62S				SMS2M64R											mβCD	WT				∆SMS1/2				SMS2				SMS2I62S				SMS2M64R
		0.0mM	0.6363	0.6511	0.8465	0.8809	0.7855	0.7036	0.700035	0.7245	0.7491	0.891	0.8491	0.895544	0.5833	0.6072	0.6171	0.6194	0.706	0.7797	0.6825	0.781								0.0mM	0.82	0.8431	0.8919	0.9101	0.8073	0.8774	0.8859	0.90489	0.6815	0.6432	0.6604	0.70006	0.7672	0.7933	0.7861	0.895005	0.8931	0.8113	0.8196
		1.5mM	0.7179	0.6961	0.7504	0.9313	0.6511	0.5748	0.3435	0.590006	0.7595	0.7419	0.6486	0.600007	0.418445	0.4308	0.3881	0.5222	0.6045	0.6131	0.5489	0.5585								1.5mM	0.8608	0.854	0.8319	0.820035	0.7104	0.6863	0.7596	0.66	0.6338	0.6362	0.631	0.5524	0.64174	0.6044	0.5832	0.5889	0.6126	0.509	0.5917
		2.5mM	0.6345	0.7044	0.7473	0.61	0.2932	0.3339	0.2626	0.32229	0.6411	0.5123	0.5365	0.475931	0.3106	0.20867	0.2306	0.10688	0.2967	0.3478	0.3035	0.2221								2.5mM	0.7723	0.8742	0.7193	0.734445	0.5184	0.3094	0.4017	0.456889	0.60397	0.5443	0.64754	0.5163	0.4581	0.3544	0.4917	0.4135	0.4541	0.39205	0.459
		5.0mM	0.611	0.6657	0.7439	0.545112	0.2208	0.2966	0.2179	0.0786995	0.4207	0.3869	0.5506	0.40948	0.100058	0.0853	0.2118	0.2641	0.1901	0.2717	0.20924	0.2251								5.0mM	0.6633	0.6984	0.4105	0.500001	0.2965	0.3111	0.296	0.289959	0.5286	0.4075	0.5485	0.45167	0.309	0.3228	0.2878	0.3202	0.362	0.2552	0.3368
		10.0mM	0.2848	0.3639	0.4418	0.3562	0.0956	0.119	0.0292	0.094	0.3449	0.3622	0.3977	0.2855	0.15	0.1634	0.0988	0.010321	0.1385	0.1503	0.0512	0.1089								10.0mM	0.4427	0.4231	0.4165	0.400046	0.163	0.10423	0.1286	0.139423	0.310001	0.3916	0.331	0.2109	0.2113	0.198	0.1507	0.300057	0.2661	0.2843	0.3123
		Average Untreated	0.7537	0.728409	0.846186	0.60675	0.7373																							Average Untreated	0.866275	0.868872	0.67129	0.810401	0.8305
		Min	0.010321																											Min	0.10423
			Normalized values																					Average							Normalized values
		mβCD	WT				∆SMS1/2				SMS2				SMS2I62S				SMS2M64R					WT	∆SMS1/2	SMS2	SMS2I62S	SMS2M64R		mβCD	WT				∆SMS1/2				SMS2				SMS2I62S				SMS2M64R
		0.0mM	84.2072	86.1982	112.484	117.111	107.95	96.5452	96.0487	99.4557	88.385	105.361	100.349	105.905	96.0683	100.075	101.735	102.121	95.6945	105.832	92.462	106.011		100	100	100	100	100		0.0mM	93.9276	96.9588	103.363	105.751	91.9475	101.115	102.227	104.71	101.801	95.0464	98.0796	105.074	93.8823	97.5783	96.5587	111.981	108.619	97.3564	98.4992
		1.5mM	95.1842	92.2516	99.5561	123.891	89.2341	78.6086	46.3981	80.7262	89.6292	87.5236	76.3615	70.548	68.4279	70.4994	63.3401	85.824	81.7326	82.9156	74.0845	75.4051		102.721	73.7417	81.0156	72.0229	78.5345		1.5mM	99.2815	98.3892	95.4891	93.9321	79.275	76.1232	85.7093	72.6836	93.3887	93.8119	92.8949	79.034	76.1161	70.8284	67.8263	68.6335	69.9974	55.7327	67.1197
		2.5mM	83.9651	93.3681	99.1391	80.6694	39.3934	45.0612	35.1321	43.4444	75.4642	60.055	62.9502	55.704	50.3461	33.256	36.933	16.1895	39.393	46.4221	40.3284	29.1314		89.2854	40.7578	63.5434	34.1812	38.8187		2.5mM	87.668	101.04	80.7131	82.7005	54.1652	26.8321	38.9031	46.1208	88.1282	77.6055	95.8117	72.6678	50.1111	35.4263	54.8691	43.7953	48.1735	39.6299	48.8482
		5.0mM	80.8039	88.1622	98.6817	71.9406	29.311	39.8669	28.9072	9.5223	49.0963	45.0526	64.6371	47.754	15.0457	12.5713	33.7809	42.5497	24.7296	35.9541	27.3624	29.544		84.8971	26.9018	51.635	25.9869	29.3975		5.0mM	73.3644	77.9704	40.1905	51.9353	25.1451	27.0545	25.0797	24.2897	74.8369	53.4811	78.3462	61.2704	28.9972	30.9514	25.9951	30.5832	35.4923	20.787	32.0225
		10.0mM	36.9232	47.5638	58.0429	46.5279	11.8758	15.1345	2.62907	11.653	40.0279	42.0976	46.3447	32.9215	23.4192	25.6659	14.8348	0	17.6317	19.2549	5.62313	13.5601		47.2645	10.3231	40.3479	15.98	14.0175		10.0mM	44.416	41.844	40.9779	38.8187	7.68594	0	3.18711	4.60252	36.2873	50.6772	39.9905	18.8111	15.162	13.2786	6.58056	27.7308	22.2879	24.7938	28.6491
			WT			∆SMS1/2			SMS2			SMS2I62S			SMS2M64R			Std
		mβCD	Rep 1	Rep 2	Rep 3	Rep 1	Rep 2	Rep 3	Rep 1	Rep 2	Rep 3	Rep 1	Rep 2	Rep 3	Rep 1	Rep 2	Rep 3	WT	∆SMS1/2	SMS2	SMS2I62S	SMS2M64R
		0.0mM	100	100	100	100	100	100	100	100	100	100	100	100	100	100	100	1.00486e-14	1.00486e-14	1.74047e-14	0	1.00486e-14
		1.5mM	102.721	96.773	99.7103	73.7417	78.4478	61.5003	81.0156	89.7824	89.7512	72.0229	70.8511	81.3444	78.5345	68.5207	82.2417	2.97393	8.74847	5.05255	5.432	7.09795
		2.5mM	89.2854	88.0304	95.8367	40.7578	41.5053	49.7807	63.5434	83.5533	82.7741	34.1812	46.0504	56.901	38.8187	45.3423	63.42	4.19194	5.00755	11.3345	9.10132	12.7448
		5.0mM	84.8971	60.8652	84.1091	26.9018	25.3922	29.8112	51.635	66.9837	80.2274	25.9869	29.1317	46.5358	29.3975	32.7901	57.5871	13.653	2.24612	14.3091	9.97241	15.3897
		10.0mM	47.2645	41.5141	60.49	10.3231	3.86889	22.1132	40.3479	36.4415	55.7828	15.98	15.688	19.6505	14.0175	22.8489	14.947	9.73024	9.25127	10.2272	2.89321	4.85283
			p value paired, two-tailed t test
		mβCD	WT & ∆SMS1/2	∆SMS1/2 & SMS2	∆SMS1/2 & SMS2I62S	∆SMS1/2 & SMS2M64R
		0.0mM	1	1	1	1
		1.5mM	0.0383036	0.135561	0.714857	0.616383
		2.5mM	0.000259519	0.0279001	0.725556	0.372732
		5.0mM	0.0194605	0.0355	0.342341	0.246214
		10.0mM	0.00012111	0.00112998	0.349862	0.565808
[truncated: 32 more columns]
