# Supplementary material for: Pathogenic variants of sphingomyelin synthase SMS2 disrupt lipid landscapes in the secretory pathway
Source: eLife. 2022 Sep 14;11:e79278. doi: 10.7554/eLife.79278 (PMC9531943; doi:10.7554/eLife.79278)
Supplement: Figure 9—source data 1. [file elife-79278-fig9-data1.xlsx]

## Sheet: Fig. 9C
	wild type	SMS2I62S	SMS2M64R				wild type	SMS2I62S	SMS2M64R
cell 1	0.432	0.444	0.318			Average	0.5544	0.4245	0.3614
cell 2	0.431	0.408	0.336			std	0.0930479	0.03353	0.0337563
cell 3	0.621	0.437	0.347
cell 4	0.743	0.435	0.379				p value, unpaired two-tailed t-test
cell 5	0.664	0.48	0.392				wildtype & SMS2I62S		wild type & SMS2M64R
cell 6	0.57	0.419	0.311				1.38543e-09		2.56371e-15
cell 7	0.506	0.446	0.319
cell 8	0.51	0.492	0.268
cell 9	0.553	0.409	0.319
cell 10	0.551	0.395	0.349
cell 11	0.553	0.363	0.397
cell 12	0.563	0.41	0.347
cell 13	0.59	0.391	0.362
cell 14	0.517	0.4	0.4
cell 15	0.598	0.399	0.385
cell 16	0.813	0.47	0.365
cell 17	0.743	0.393	0.395
cell 18	0.6	0.407	0.387
cell 19	0.467	0.421	0.333
cell 20	0.604	0.384	0.382
cell 21	0.416	0.424	0.408
cell 22	0.508	0.447	0.364
cell 23	0.518	0.437	0.396
cell 24	0.539	0.42	0.391
cell 25	0.451	0.417	0.342
cell 26	0.517	0.384	0.387
cell 27	0.494	0.427	0.352
cell 28	0.492	0.448	0.342
cell 29	0.505	0.414	0.366
cell 30	0.563	0.514	0.403

## Sheet: Fig. 9D
	wild type	SMS2I62S	SMS2M64R				wild type	SMS2I62S	SMS2M64R
cell 1	0.443	0.499	0.508			Average	0.390433	0.4953	0.49163
cell 2	0.392	0.502	0.49			std	0.015489	0.0290091	0.0265868
cell 3	0.405	0.547	0.515
cell 4	0.381	0.508	0.502				p value, unpaired two-tailed t-test
cell 5	0.382	0.475	0.499				wildtype & SMS2I62S		wild type & SMS2M64R
cell 6	0.404	0.456	0.481				9.00708e-25		1.85463e-24
cell 7	0.39	0.505	0.468
cell 8	0.386	0.475	0.518
cell 9	0.386	0.493	0.507
cell 10	0.369	0.48	0.492
cell 11	0.388	0.498	0.564
cell 12	0.386	0.53	0.463
cell 13	0.381	0.517	0.475
cell 14	0.364	0.518	0.511
cell 15	0.382	0.481	0.523
cell 16	0.392	0.475	0.467
cell 17	0.371	0.506	0.48
cell 18	0.373	0.488	0.472
cell 19	0.381	0.534	0.513
cell 20	0.387	0.507	0.511
cell 21	0.39	0.469	0.446
cell 22	0.399	0.501	0.488
cell 23	0.397	0.478	0.477
cell 24	0.406	0.485	0.513
cell 25	0.397	0.449	0.443
cell 26	0.393	0.538	0.46
cell 27	0.386	0.508	0.488
cell 28	0.381	0.451
cell 29	0.419	0.434
cell 30	0.402	0.552
