# Supplementary material for: Pathogenic variants of sphingomyelin synthase SMS2 disrupt lipid landscapes in the secretory pathway
Source: eLife journal article supplement (doi:10.7554/elife.79278), 2022-09-14

$\alpha$ -calnexin (top) /  $\alpha$ -SMS2 (bottom)

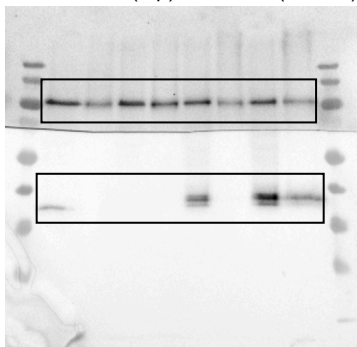

$\alpha$ -Na/K-ATPase (after  $\alpha$ -LAMP1)

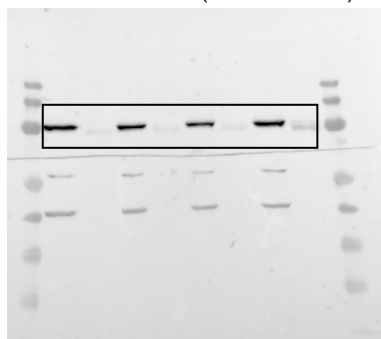

$\alpha$ -LAMP1 (top) /  $\alpha$ -pMito60 (bottom)

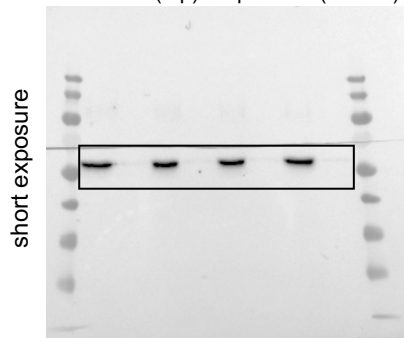

$\alpha$ -actin (after  $\alpha$ -pMito60)

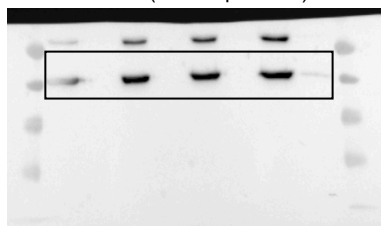

$\alpha$ -LAMP1 (top) /  $\alpha$ -pMito60 (bottom)

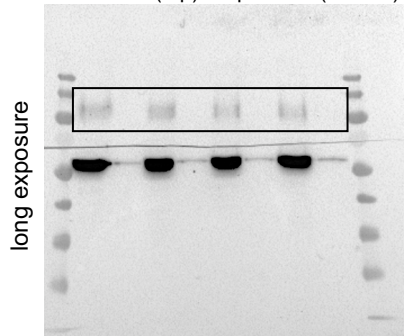

Supplement: supp [file elife-79278-supp-v1.zip]
