# Supplementary material for: Pathogenic variants of sphingomyelin synthase SMS2 disrupt lipid landscapes in the secretory pathway
Source: eLife journal article supplement (doi:10.7554/elife.79278), 2022-09-14

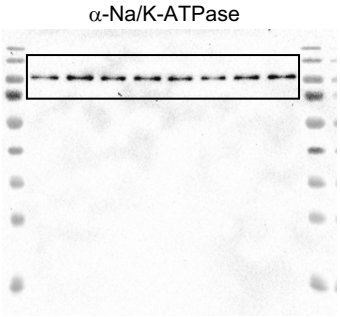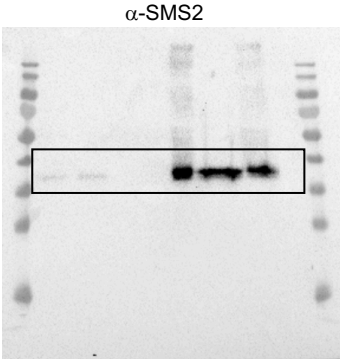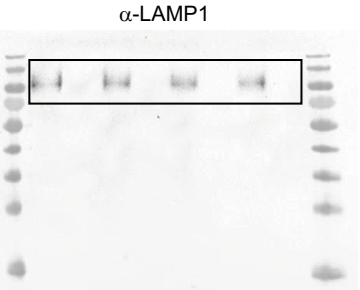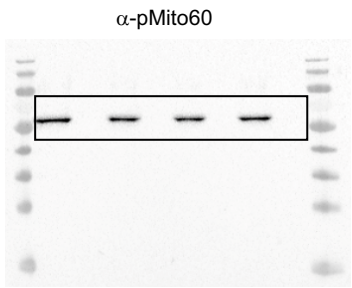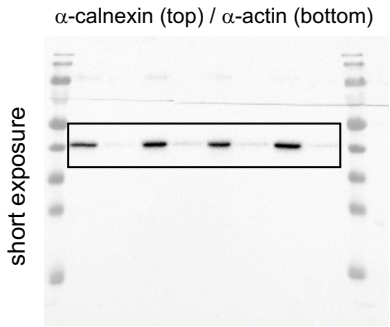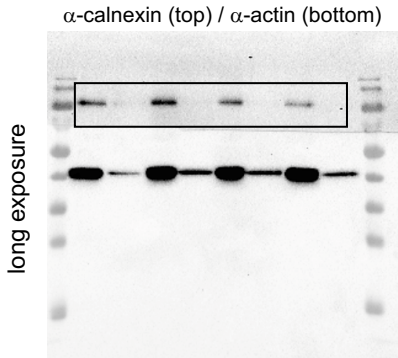

Supplement: supp [file elife-79278-supp-v1.zip]
