# Supplementary material for: Pathogenic variants of sphingomyelin synthase SMS2 disrupt lipid landscapes in the secretory pathway
Source: eLife journal article supplement (doi:10.7554/elife.79278), 2022-09-14
Supplement: supp [file elife_poa_e79278_Source_data_1.xlsx]

## Sheet: Fig. 2d
				SM species expressed as mol% of total phospholipid analyzed
		minus dox		wildtype			∆SMS1/2			SMS2			SMS2I62S			SMS2M64R
				Rep 1	Rep 2	Rep 3	Rep 1	Rep 2	Rep 3	Rep 1	Rep 2	Rep 3	Rep 1	Rep 2	Rep 3	Rep 1	Rep 2	Rep 3
		SM(d34:0)	d18:0/16:0	0.192011	0.189679	0.180853	0.00100793	0.000574029	0.000478924	0.0015599	0.00184942	0.00104903	0.00174577	0.00176607	0.0013126	0.000692586	0.00114587	0.00132981
		SM(d18:1_16:0)	d18:1/16:0	1.35743	1.36412	1.409	0.0326933	0.0298956	0.0319715	0.0433249	0.0466928	0.0454875	0.0436625	0.0454825	0.046373	0.0384433	0.0385332	0.0369067
		SM(d40:2)	d18:1/22:1	0.124508	0.130899	0.116724	0.000583102	0.000496284	0.000835766	0.000449584	0.000436951	0.00109928	0.000489527	0.000403499	0.000622938	0.00124019	0.00112074	0.000946462
		SM(d42:1)	d18:1/24:0	0.101761	0.0959511	0.0963322	0.000251419	0.00016842	0.000199254	0.000250576	0.000149122	0.000270104	0.000340854	0.000441387	0.000393618	0.000653099	0.000440275	0.000618285
		SM(d42:2)	d18:1/24:1	1.62358	1.57692	1.60157	0.00779133	0.00704647	0.00680772	0.0114632	0.0131195	0.0130477	0.0138713	0.0154308	0.0156227	0.0157444	0.0152804	0.0166917
		SM(d18:1_24:2)	d18:1/24:2	0.30464	0.315065	0.294071	0.00955601	0.0106323	0.0101167	0.00926192	0.00934871	0.0101289	0.00923051	0.00925083	0.0100807	0.0126966	0.0118882	0.0125754
		plus dox		wildtype			∆SMS1/2			SMS2			SMS2I62S			SMS2M64R
				Rep 1	Rep 2	Rep 3	Rep 1	Rep 2	Rep 3	Rep 1	Rep 2	Rep 3	Rep 1	Rep 2	Rep 3	Rep 1	Rep 2	Rep 3
		SM(d34:0)	d18:0/16:0	0.174061	0.19896	0.205992	0.000516202	0.000786197	0.000769935	0.0498156	0.055412	0.0614836	0.484295	0.651398	0.715095	0.596587	0.650377	0.674028
		SM(d18:1_16:0)	d18:1/16:0	1.33134	1.35952	1.30814	0.0319608	0.0337129	0.0328587	0.601656	0.570955	0.615847	1.67178	1.85106	1.88676	1.78141	1.84832	1.81401
		SM(d40:2)	d18:1/22:1	0.118092	0.123243	0.112767	0.000870703	0.000549772	0.000878678	0.0631358	0.0569371	0.0620397	0.196719	0.229842	0.237123	0.27007	0.283537	0.273547
		SM(d42:1)	d18:1/24:0	0.078308	0.0789039	0.0777123	0.000264522	0.000184269	0.000221067	0.0241286	0.0203847	0.0263477	0.110893	0.194571	0.202542	0.133492	0.146098	0.159111
		SM(d42:2)	d18:1/24:1	1.35645	1.42002	1.38379	0.00674997	0.00659087	0.00690191	0.430867	0.373608	0.450194	0.742051	1.03268	0.990352	0.831537	0.849701	0.861212
		SM(d18:1_24:2)	d18:1/24:2	0.264901	0.284254	0.262283	0.00844856	0.00822526	0.00797623	0.0952492	0.0914228	0.0953808	0.148541	0.163408	0.161375	0.120788	0.124133	0.116488
		minus dox		Average					STD
				wildtype	∆SMS1/2	SMS2	SMS2I62S	SMS2M64R	wildtype	∆SMS1/2	SMS2	SMS2I62S	SMS2M64R
		SM(d34:0)	d18:0/16:0	0.187515	0.000686961	0.000870952	0.00160814	0.00105609	0.0058854	0.000282005	0.000405262	0.000256153	0.00032796
		SM(d18:1_16:0)	d18:1/16:0	1.37685	0.0315201	0.035064	0.0451727	0.0379611	0.028039	0.00145242	0.00170645	0.00138159	0.00091421
		SM(d40:2)	d18:1/22:1	0.124044	0.000638384	0.000593878	0.000505321	0.00110247	0.00709874	0.000176364	0.000378803	0.000110569	0.000147714
		SM(d42:1)	d18:1/24:0	0.0980149	0.000206365	0.000206084	0.000391953	0.000570553	0.00325016	4.19536e-05	6.49499e-05	5.02871e-05	0.000114159
		SM(d42:2)	d18:1/24:1	1.60069	0.00721518	0.00843914	0.0149749	0.0159055	0.0233393	0.000513044	0.000936216	0.000960581	0.00071934
		SM(d18:1_24:2)	d18:1/24:2	0.304592	0.0101017	0.0100037	0.00952069	0.0123867	0.0104967	0.000538305	0.000477476	0.000485127	0.000435992
		plus dox		Average					STD
				wildtype	∆SMS1/2	SMS2	SMS2I62S	SMS2M64R	wildtype	∆SMS1/2	SMS2	SMS2I62S	SMS2M64R
		SM(d34:0)	d18:0/16:0	0.193005	0.000690778	0.0555704	0.61693	0.640331	0.0167779	0.000151406	0.0058356	0.119198	0.039686
		SM(d18:1_16:0)	d18:1/16:0	1.333	0.0328441	0.596152	1.8032	1.81458	0.0257282	0.000876156	0.0229463	0.115202	0.0334601
		SM(d40:2)	d18:1/22:1	0.118034	0.000766384	0.0607042	0.221228	0.275718	0.00523777	0.000187634	0.00330809	0.0215356	0.00699111
		SM(d42:1)	d18:1/24:0	0.0783081	0.000223286	0.0236203	0.169336	0.146234	0.000595778	4.01728e-05	0.00301381	0.0507694	0.0128096
		SM(d42:2)	d18:1/24:1	1.38675	0.00674758	0.418223	0.921695	0.847483	0.0318894	0.000155532	0.0398278	0.157009	0.0149609
		SM(d18:1_24:2)	d18:1/24:2	0.270479	0.00821669	0.0940176	0.157775	0.12047	0.0120011	0.000236282	0.00224813	0.00806104	0.00383226

## Sheet: Fig. 3c
			Lipid species expressed as mol% of total lipid analyzed
		WC					ER
		Rep 1	Rep 2	Rep 3	Rep 4		Rep 1	Rep 2	Rep 3	Rep 4
	SM	7.36348	6.32018	7.17348	7.30619		1.36482	1.21511	0.996871	1.05917
	Cer	0.351126	1.41757	0.787351	0.84915		0.551796	0.733309	0.721174	0.584044
	Cer/SM	0.0476848	0.224292	0.109758	0.116223		0.4043	0.603492	0.723438	0.551419
	Chol	26.3947	24.472	24.6167	23.2966		7.68281	8.70875	7.05618	6.10675
	BMP (PG40:6)	0.00812374	0.00306511	0.00263994	0.00138134		0	0	0	0
	PC	39.7984	30.7251	35.4503	33.8688		63.5214	64.1702	65.2387	58.6294
	CL	2.85976	0.466834	1.49536	1.53791		0.0256173	0.0115656	0.173063	0.168519
		Average		STD		p value, paired two-tailed t-test
		WC	ER	WC	ER
	SM	7.04084	1.15899	0.48698	0.165088	4.56928e-07
	Cer	0.851299	0.647581	0.43777	0.0930538	0.397725
	Cer/SM	0.12449	0.570662	0.0733596	0.132243	0.00105265
	Chol	24.695	7.38862	1.27804	1.09286	8.55387e-07
	BMP (PG40:6)	0.00380253	0	0.00296819	0	0.0427823
	PC	34.9607	62.8899	3.77604	2.92727	2.36122e-05
	CL	1.58997	0.0946912	0.980724	0.088079	0.0228879
	Note- data in 3c are part of 3d

## Sheet: Fig. 3d
					Lipid species expressed as mol% of total lipid analyzed
	WT													∆SMS1/2													SMS2													SMS2M64R
	WC				ER				WC	ER	WC	ER		WC				ER				WC	ER	WC	ER		WC				ER				WC	ER	WC	ER		WC				ER				WC	ER
	Replicate 1	Replicate 2	Replicate 3	Replicate 4	Replicate 1	Replicate 2	Replicate 3	Replicate 4	Average		Std			Replicate 1	Replicate 2	Replicate 3	Replicate 4	Replicate 1	Replicate 2	Replicate 3	Replicate 4	Average		Std			Replicate 1	Replicate 2	Replicate 3	Replicate 4	Replicate 1	Replicate 2	Replicate 3	Replicate 4	Average		Std			Replicate 1	Replicate 2	Replicate 3	Replicate 4	Replicate 1	Replicate 2	Replicate 3	Replicate 4	Average
SM	7.36348	6.32018	7.17348	7.30619	1.36482	1.21511	0.996871	1.05917	7.04084	1.15899	0.48698	0.165088		0.280921	0.204779	0.197055	0.208507	0.374525	0.0141096	0.234122	0.0598692	0.222815	0.170656	0.0390292	0.165701		7.32172	3.00193	6.98679	7.15576	2.4266	0.917109	1.44632	1.37492	6.11655	1.54124	2.08091	0.635102		11.5861	8.22954	9.82677	11.2737	11.7445	8.87283	9.56247	9.80108	10.229	9.99523
PC	39.7984	30.7251	35.4503	33.8688	63.5214	64.1702	65.2387	58.6294	34.9607	62.8899	3.77604	2.92727		46.7003	41.1555	43.8295	41.8064	70.2571	68.7	53.1885	64.7306	43.3729	64.2191	2.49338	7.71301		37.7266	38.0041	33.3279	33.3324	57.8681	65.5309	66.8937	57.3491	35.5978	61.9104	2.62084	5.0029		31.557	30.6333	27.6994	27.7625	52.3532	44.9276	41.04	45.9238	29.4131	46.0611
GSL	0.803035	0.675601	0.844898	0.768171	0.594616	0.401934	0.260691	0.261854	0.772926	0.379774	0.072068	0.157833		2.01912	1.67777	2.03962	2.0823	0.543058	0.541065	2.11538	0.978711	1.9547	1.04455	0.186488	0.742969		1.34067	2.26698	1.20937	1.27846	1.44877	0.740687	0.313952	0.406489	1.52387	0.727475	0.498299	0.514613		1.36956	1.95665	1.19538	1.08948	0.627855	1.14804	0.618987	0.546966	1.40277	0.735463
DAG	1.46025	1.18423	1.08187	1.15662	1.86332	2.12122	1.79024	1.39674	1.22074	1.79288	0.16542	0.299835		1.67054	1.10479	1.06792	1.05673	2.42634	2.18224	1.54908	1.92251	1.22499	2.02004	0.297741	0.375367		1.38365	0.944316	0.532264	0.756517	2.24518	1.41314	1.36708	1.70207	0.904188	1.68187	0.361309	0.403746		1.70707	1.02773	1.23644	1.43942	2.52215	2.94156	4.91157	4.2587	1.35267	3.65849
Cer	0.351126	1.41757	0.787351	0.84915	0.551796	0.733309	0.721174	0.584044	0.851299	0.647581	0.43777	0.0930538		0.376449	1.19523	0.892479	1.11022	0.740447	0.832035	0.610829	0.66071	0.893595	0.711005	0.367583	0.0967472		0.252559	0.76376	0.724256	0.748106	0.456647	0.680349	0.419007	0.429789	0.62217	0.496448	0.246942	0.123618		0.210852	1.106	1.03518	0.810451	0.348245	0.394639	0.236633	0.379888	0.790622	0.339851
PS	0.988982	0.581849	1.04871	0.912386	0.560251	0.437798	0.365267	0.565997	0.882982	0.482328	0.208365	0.0979094		0.94942	0.768399	0.823368	0.813049	0.418998	0.432913	1.79682	0.48643	0.838559	0.783789	0.077662	0.675976		1.36686	0.835484	1.12249	1.05755	0.580519	0.363553	0.525197	0.902088	1.0956	0.592839	0.218641	0.225784		0.994341	0.699106	0.598118	0.597867	0.825054	0.562723	0.729147	0.301417	0.722358	0.604585
CerP	0.00222858	0.0151289	0.00649614	0.00990067	0	0	0	0.000124983	0.00843856	3.12458e-05	0.00545389	6.24917e-05		0	0.000172057	0.00048808	0	0.000242508	0.000105447	0.00129245	0.00068977	0.000165034	0.000582543	0.000230131	0.000535011		0.0038438	0.00336574	0.0176194	0.028647	0.000776219	0	0.000263613	0.00532203	0.013369	0.00159047	0.0121419	0.0025085		0.00427226	0.0128744	0.0183014	0.0253049	0.000387713	0.0543462	0.0264677	0.0653307	0.0151882	0.0366331
PE	4.41417	8.12737	6.71515	8.20236	5.34196	3.10693	4.53804	6.35946	6.86476	4.8366	1.77117	1.373		5.63467	7.19579	7.97508	7.5955	3.41332	3.59876	5.60048	3.26693	7.10026	3.96987	1.02756	1.09552		3.93338	7.20194	7.66405	9.56873	3.09295	4.03148	4.05879	6.44677	7.09203	4.4075	2.34168	1.43174		7.31417	8.32789	10.0178	9.3834	9.15482	9.75445	5.61798	7.79983	8.76082	8.08177
Chol	26.3947	24.472	24.6167	23.2966	7.68281	8.70875	7.05618	6.10675	24.695	7.38862	1.27804	1.09286		24.207	23.0487	22.7396	23.4622	6.76409	6.15316	16.7117	9.5634	23.3644	9.79809	0.634967	4.84232		29.7989	25.5948	25.6767	23.1743	16.0014	7.22038	6.86572	7.3131	26.0612	9.35016	2.74893	4.43837		25.94	28.0661	23.9125	24.1732	7.60962	12.8533	18.1375	9.15415	25.523	11.9387
Chol ester	3.31493	0.736903	0.563008	0.452108	0.746547	0.660052	0.776401	0.346555	1.26674	0.632389	1.37048	0.19684		5.06279	1.20361	0.748845	0.664528	1.16635	0.746306	0.440456	0.623185	1.91994	0.744075	2.10857	0.308286		1.3527	0.652284	0.388313	0.41137	0.956132	0.579019	0.213361	0.217365	0.701168	0.491469	0.450462	0.35405		1.83959	0.57186	0.59471	0.524805	0.761726	0.378917	1.57871	0.300389	0.882741	0.754935
PA	0.108913	0.103383	0.141506	0.116219	0.171822	0.148615	0.0807904	0.187946	0.117505	0.147293	0.0168417	0.047183		0.0967245	0.148047	0.116295	0.142884	0.152988	0.169125	0.335111	0.124882	0.125988	0.195527	0.0239608	0.0948351		0.117595	0.119428	0.0997764	0.0805025	0.0867894	0.155054	0.186998	0.392856	0.104326	0.205424	0.0181879	0.131759		0.0898873	0.0885992	0.0509969	0.0513785	0.0432613	0.175311	0.112604	0.254607	0.0702155	0.146446
PI	1.70539	2.50764	3.43388	3.25196	5.29283	5.6906	3.88917	8.83207	2.72472	5.92617	0.788888	2.08569		1.79868	3.53483	2.93907	3.58953	4.07534	4.8139	6.14752	5.55953	2.96553	5.14907	0.831808	0.900116		1.80093	3.42026	3.645	3.34834	4.51397	6.18092	6.34056	11.7337	3.05363	7.1923	0.844638	3.13829		1.74753	3.16728	2.6342	2.86346	4.46742	6.6746	8.78329	10.6861	2.60312	7.65285
	p value, paired two-tailed t-test
	WT vs ∆SMS1/2		SMS2 vs SMS2M64R
	WC	ER	WC	ER
SM	9.07824e-05	0.00159341	0.00355643	0.000102154
PC	0.00146341	0.786236	0.000668709	0.0400855
GSL	0.000367488	0.218973	0.221618	0.979161
DAG	0.956059	0.324935	0.0579448	0.0665887
Cer	0.70324	0.386797	0.170886	0.0541802
PS	0.641802	0.483151	0.0217869	0.957785
CerP	0.0559467	0.129097	0.551909	0.0865449
PE	0.71374	0.443804	0.119064	0.0643994
Chol	0.0843099	0.442214	0.728609	0.576247
Chol ester	0.175957	0.544959	0.221515	0.531084
PA	0.639458	0.5445	0.00619378	0.171519
PI	0.500208	0.544961	0.117193	0.574787
[truncated: 2 more columns]

## Sheet: Fig. 3e
	ER: PC species in order of double bonds											ER: # double bonds in PC species												ER: PC species in order of carbons											ER: # carbons in PC species
		SMS2					SMS2M64R						SMS2					SMS2M64R							SMS2					SMS2M64R						SMS2					SMS2M64R
		Rep 1	Rep 2	Rep 3	Rep 4		Rep 1	Rep 2	Rep 3	Rep 4		# double bonds	Rep 1	Rep 2	Rep 3	Rep 4		Rep 1	Rep 2	Rep 3	Rep 4				Rep 1	Rep 2	Rep 3	Rep 4		Rep 1	Rep 2	Rep 3	Rep 4		# carbons	Rep 1	Rep 2	Rep 3	Rep 4		Rep 1	Rep 2	Rep 3	Rep 4
	PC 28:0	0	0.0597817	0.0453513	0.022796		0.0734281	0.107987	0.0732847	0.068114		0	4.36894	7.24317	4.38685	3.54566		2.6005	3.52557	1.97818	2.16466														28	0	0.0597817	0.0453513	0.022796		0.0734281	0.107987	0.0732847	0.068114
	PC 30:0	0.87764	1.9657	1.1549	0.945684		1.0195	1.43874	0.947943	1.03839		1	20.3086	26.3343	24.9043	20.7083		16.2491	16.3362	13.3763	15.5724			PC 28:0	0	0.0597817	0.0453513	0.022796		0.0734281	0.107987	0.0732847	0.068114		30	1.02023	2.40853	1.49344	1.22083		1.4723	1.96554	1.32486	1.46342
	PC 32:0	3.20723	4.53344	2.77607	2.24919		1.3418	1.72329	0.765254	0.839673		2	19.4449	19.4555	22.9706	19.4842		20.533	15.0787	15.991	17.9238				0	0.0597817	0.0453513	0.022796		0.0734281	0.107987	0.0732847	0.068114		32	8.81106	12.4689	9.71491	8.04163		7.22504	7.22868	5.30447	6.02895
	PC 34:0	0	0	0	0		0	0	0	0		3	4.82788	5.2659	6.38991	5.66794		6.09689	4.03376	4.39845	4.51626														34	23.5434	26.4067	25.954	21.9348		19.1037	16.772	15.0651	17.2968
	PC 36:0	0.284068	0.684235	0.410533	0.327989		0.165774	0.255547	0.191701	0.218483		4	3.19307	3.27333	3.47446	3.30371		2.76456	2.43278	2.22356	2.48971			PC 30:2	0.0116098	0.0104311	0.0224343	0.0105762		0.00182015	0.067677	0.00816734	0.00477239		36	17.9861	18.8714	22.7107	19.5992		18.4538	14.037	14.4415	16.0769
	PC 38:0	0	0	0	0		0	0	0	0		5	4.57338	2.77646	3.35131	3.21752		2.62157	2.24515	1.98867	2.18584			PC 30:1	0.130983	0.43239	0.316106	0.264568		0.450977	0.459116	0.368749	0.420266		38	4.87064	3.79775	4.98693	4.59794		4.13573	3.20723	3.24345	3.50031
		4.36894	7.24317	4.38685	3.54566		2.6005	3.52557	1.97818	2.16466		6	0.643321	0.269127	0.600774	0.616944		0.721744	0.472973	0.304312	0.266055			PC 30:0	0.87764	1.9657	1.1549	0.945684		1.0195	1.43874	0.947943	1.03839		40	1.19727	0.619045	1.2739	1.22809		1.34357	0.786794	0.686587	0.575531
												>6	0.608869	0.913206	0.814914	0.803685		0.960361	0.802841	0.791214	0.805148				1.02023	2.40853	1.49344	1.22083		1.4723	1.96554	1.32486	1.46342		42	0.0126753	0.266042	0.171088	0.198438		0.0998648	0.231514	0.220642	0.194857
	PC 30:1	0.130983	0.43239	0.316106	0.264568		0.450977	0.459116	0.368749	0.420266			57.969	65.5309	66.8931	57.348		52.5477	44.9279	41.0518	45.9238														44	0.527671	0.632822	0.543313	0.504294		0.640279	0.591191	0.691826	0.718926
	PC 32:1	5.05809	6.70853	5.93602	4.94411		4.80689	4.49642	3.7027	4.27709														PC 32:4	0	0.00499097	0	0		0	0	0	0			57.969	65.5309	66.8937	57.348		52.5477	44.9279	41.0518	45.9238
	PC 34:1	15.1196	17.9844	17.2814	14.428		10.9913	10.7247	9.1088	10.6003														PC 32:3	0	0.197699	0.134796	0.114977		0.128332	0.181264	0.121483	0.102009
	PC 36:1	0	0.83793	0.974945	0.733235		0	0.524334	0.0539316	0.139186		ER: # double bonds in PC species expressed as fraction of total												PC 32:2	0.545735	1.02424	0.868023	0.733356		0.948021	0.827695	0.715028	0.810171
	PC 38:1	0	0.370986	0.395842	0.33845		0	0.131578	0.130629	0.132087			SMS2					SMS2M64R						PC 32:1	5.05809	6.70853	5.93602	4.94411		4.80689	4.49642	3.7027	4.27709			# carbons in PC species expressed as fraction of total
	PC 40:1	0	0	0	0		0	0	0.00190617	0.00100127		# double bonds	Rep 1	Rep 2	Rep 3	Rep 4		Rep 1	Rep 2	Rep 3	Rep 4			PC 32:0	3.20723	4.53344	2.77607	2.24919		1.3418	1.72329	0.765254	0.839673			SMS2					SMS2M64R
		0	0	0	0		0	0	0.00960894	0.00241136		0	0.0753668	0.11053	0.06558	0.0618272		0.0494883	0.0784717	0.0481875	0.0471358				8.81106	12.4689	9.71491	8.04163		7.22504	7.22868	5.30447	6.02895		# carbons	Rep 1	Rep 2	Rep 3	Rep 4		Rep 1	Rep 2	Rep 3	Rep 4
		20.3086	26.3343	24.9043	20.7083		16.2491	16.3362	13.3763	15.5724		1	0.350336	0.40186	0.3723	0.3611		0.309226	0.363608	0.32584	0.339091														28	0	0.000912266	0.00067796	0.000397503		0.00139736	0.00240355	0.00178518	0.0014832
												2	0.335436	0.29689	0.343393	0.339753		0.390749	0.33562	0.389534	0.390294			PC 34:5	0.745312	0.161327	0.0848529	0.0941441		0.0519721	0.143044	0.0912481	0.166855		30	0.0175996	0.036754	0.0223256	0.0212881		0.0280182	0.0437487	0.0322729	0.0318663
	PC 30:2	0.0116098	0.0104311	0.0224343	0.0105762		0.00182015	0.067677	0.00816734	0.00477239		3	0.0832838	0.0803574	0.0955242	0.0988341		0.116026	0.089783	0.107144	0.0983425			PC 34:4	0.254372	0.586396	0.440712	0.398593		0.341117	0.429624	0.292611	0.385354		32	0.151996	0.190275	0.145229	0.140225		0.137495	0.160895	0.129214	0.131281
	PC 32:2	0.545735	1.02424	0.868023	0.733356		0.948021	0.827695	0.715028	0.810171		4	0.0550823	0.0499509	0.0519405	0.0576082		0.0526105	0.0541485	0.0541647	0.054214			PC 34:3	1.04093	1.22325	1.12466	1.00143		1.14894	0.808184	0.742773	0.787861		34	0.406137	0.402965	0.387989	0.382485		0.363549	0.373309	0.366979	0.376642
	PC 34:2	6.38319	6.45128	7.02241	6.01261		6.57042	4.66645	4.82969	5.35643		5	0.0788935	0.0423687	0.0500995	0.0561053		0.0498892	0.0499722	0.048443	0.047597			PC 34:2	6.38319	6.45128	7.02241	6.01261		6.57042	4.66645	4.82969	5.35643		36	0.310271	0.287977	0.339505	0.341759		0.351182	0.312433	0.351788	0.350078
	PC 36:2	11.9494	11.2676	14.198	12.0187		12.1388	8.74453	9.66536	10.8703		6	0.0110977	0.00410687	0.0089811	0.0107579		0.013735	0.0105274	0.0074129	0.0057934			PC 34:1	15.1196	17.9844	17.2814	14.428		10.9913	10.7247	9.1088	10.6003		38	0.0840215	0.0579535	0.0745501	0.0801762		0.0787042	0.0713862	0.0790087	0.0762198
	PC 38:2	0.553416	0.699766	0.810571	0.678611		0.869272	0.731478	0.758033	0.882134		>6	0.0105034	0.0139355	0.0121823	0.0140142		0.018276	0.0178695	0.0192736	0.0175322			PC 34:0	0	0	0	0		0	0	0	0		40	0.0206537	0.0094466	0.0190437	0.0214146		0.0255686	0.0175124	0.0167249	0.0125323
	PC 40:2	0	0.000367341	0.0460371	0.0268062		0.00470317	0.0388887	0	0															23.5434	26.4067	25.954	21.9348		19.1037	16.772	15.0651	17.2968		42	0.000218656	0.00405979	0.0025576	0.00346024		0.00190046	0.005153	0.00537472	0.00424304
	PC 42:2	0.00160752	0.00187195	0.00313985	0.00345565		0	0.00164667	0.00197468	0																									44	0.00910264	0.00965684	0.00812205	0.00879359		0.0121847	0.0131587	0.0168525	0.0156547
	PC 44:2	0	0	0	0		0	0.00032279	0.0127827	0		# double bonds	Average		Std		p value, paired two-tailed t-test							PC 36:6	0.0687365	0.0572689	0.116224	0.112786		0.115353	0.0826041	0.0674576	0.0486699
		19.4449	19.4555	22.9706	19.4842		20.533	15.0787	15.991	17.9238			SMS2	SMS2M64R	SMS2	SMS2M64R								PC 36:5	0.766864	0.836292	0.877449	0.862317		0.62342	0.585774	0.550511	0.620286
												0	0.0783261	0.0558208	0.0222153	0.0151312	0.0109306							PC 36:4	1.81425	2.0066	1.99976	1.8503		1.52611	1.44198	1.1543	1.35743		# carbons	Average		Std		p value, paired two-tailed t-test
	PC 32:3	0	0.197699	0.134796	0.114977		0.128332	0.181264	0.121483	0.102009		1	0.371399	0.334441	0.022199	0.0229646	0.00593972							PC 36:3	3.10281	3.18153	4.1338	3.69382		3.88441	2.40221	2.75826	2.82256			SMS2	SMS2M64R	SMS2	SMS2M64R
	PC 34:3	1.04093	1.22325	1.12466	1.00143		1.14894	0.808184	0.742773	0.787861		2	0.328868	0.376549	0.0215651	0.027291	0.000872316							PC 36:2	11.9494	11.2676	14.198	12.0187		12.1388	8.74453	9.66536	10.8703		28	0.000496932	0.00176732	0.000392471	0.000455598	0.00112618
	PC 36:3	3.10281	3.18153	4.1338	3.69382		3.88441	2.40221	2.75826	2.82256		3	0.0894999	0.102824	0.00904884	0.0113005	0.152634							PC 36:1	0	0.83793	0.974945	0.733235		0	0.524334	0.0539316	0.139186		30	0.0244918	0.0339765	0.00842259	0.00679095	0.00149367
	PC 38:3	0.684135	0.592418	0.826583	0.723268		0.804408	0.538742	0.660576	0.7093		4	0.0536455	0.0537844	0.00338253	0.000783102	0.944211							PC 36:0	0.284068	0.684235	0.410533	0.327989		0.165774	0.255547	0.191701	0.218483		32	0.156931	0.139721	0.0227464	0.0145478	0.0285152
	PC 40:3	0	0.0706169	0.158047	0.134437		0.13028	0.103364	0.115363	0.0945321		5	0.0568668	0.0489754	0.0157242	0.00115646	0.38477								17.9861	18.8714	22.7107	19.5992		18.4538	14.037	14.4415	16.0769		34	0.394894	0.37012	0.0114483	0.00593693	0.0488627
	PC 42:3	0	0.000378971	0.012022	0		0.00052101	0	0	0		6	0.00873588	0.00936718	0.00322255	0.00351261	0.81538																		36	0.319878	0.34137	0.0256512	0.0193043	0.0608401
	PC 44:3	0	0	0	0		0	0	0	0		>6	0.0126588	0.0182378	0.00166733	0.000754485	0.0141497							PC 38:7	0.0499214	0.0307918	0.10851	0.110154		0.102817	0.058292	0.0182855	0.00332313		38	0.0741753	0.0763298	0.0114927	0.00352445	0.653454
		4.82788	5.2659	6.38991	5.66794		6.09689	4.03376	4.39845	4.51626														PC 38:6	0	0	0	0		0	0	0	0		40	0.0176397	0.0180845	0.00555074	0.00544714	0.914053
																								PC 38:5	2.55805	1.52036	2.00924	1.96926		1.63389	1.30625	1.14946	1.26071		42	0.00257407	0.00416781	0.0016873	0.0015889	0.0379711
	PC 32:4	0	0.00499097	0	0		0	0	0	0														PC 38:4	1.02512	0.583427	0.836182	0.778197		0.72534	0.440891	0.526463	0.512754		44	0.00891878	0.0144627	0.000640052	0.00216194	0.026534
	PC 34:4	0.254372	0.586396	0.440712	0.398593		0.341117	0.429624	0.292611	0.385354														PC 38:3	0.684135	0.592418	0.826583	0.723268		0.804408	0.538742	0.660576	0.7093
	PC 36:4	1.81425	2.0066	1.99976	1.8503		1.52611	1.44198	1.1543	1.35743														PC 38:2	0.553416	0.699766	0.810571	0.678611		0.869272	0.731478	0.758033	0.882134
	PC 38:4	1.02512	0.583427	0.836182	0.778197		0.72534	0.440891	0.526463	0.512754														PC 38:1	0	0.370986	0.395842	0.33845		0	0.131578	0.130629	0.132087
	PC 40:4	0.0993213	0.0919188	0.195801	0.193097		0.171992	0.0915286	0.17793	0.14969														PC 38:0	0	0	0	0		0	0	0	0
	PC 42:4	0	0	0.00200589	0.0835297		0	0.0287544	0.0722556	0.0844848															4.87064	3.79775	4.98693	4.59794		4.13573	3.20723	3.24345	3.50031
		3.19307	3.27333	3.47446	3.30371		2.76456	2.43278	2.22356	2.48971
																								PC 40:7	0.0219807	0	0.0969177	0.11663		0.139975	0.0561614	0	0
	PC 34:5	0.745312	0.161327	0.0848529	0.0941441		0.0519721	0.143044	0.0912481	0.166855														PC 40:6	0.572813	0.197659	0.445317	0.465313		0.586278	0.287238	0.195969	0.192323
	PC 36:5	0.766864	0.836292	0.877449	0.862317		0.62342	0.585774	0.550511	0.620286														PC 40:5	0.503159	0.258483	0.331255	0.291803		0.310343	0.209614	0.195419	0.137985
	PC 38:5	2.55805	1.52036	2.00924	1.96926		1.63389	1.30625	1.14946	1.26071														PC 40:4	0.0993213	0.0919188	0.195801	0.193097		0.171992	0.0915286	0.17793	0.14969
	PC 40:5	0.503159	0.258483	0.331255	0.291803		0.310343	0.209614	0.195419	0.137985														PC 40:3	0	0.0706169	0.158047	0.134437		0.13028	0.103364	0.115363	0.0945321
	PC 42:5	0	0	0.0485139	0		0.00194035	0.000462309	0.00203053	0														PC 40:2	0	0.000367341	0.0460371	0.0268062		0.00470317	0.0388887	0	0
		4.57338	2.77646	3.35131	3.21752		2.62157	2.24515	1.98867	2.18584														PC 40:1	0	0	0	0		0	0	0.00190617	0.00100127
																								PC 40:0	0	0	0.000528061	0		0	0	0	0
	PC 36:6	0.0687365	0.0572689	0.116224	0.112786		0.115353	0.0826041	0.0674576	0.0486699															1.19727	0.619045	1.2739	1.22809		1.34357	0.786794	0.686587	0.575531
	PC 38:6	0	0	0	0		0	0	0	0
	PC 40:6	0.572813	0.197659	0.445317	0.465313		0.586278	0.287238	0.195969	0.192323														PC 42:11	0.00404506	0.0279605	0.0580641	0.0498872		0.0529133	0.079814	0.0938857	0.0823896
	PC 42:6	0.00177162	0.0141991	0.0392326	0.038845		0.0201139	0.103131	0.0408863	0.025062														PC 42:9	0.00371013	0.221631	0.00131806	0.0085395		0.00779611	0.0136107	0	0
		0.643321	0.269127	0.600774	0.616944		0.721744	0.472973	0.304312	0.266055														PC 42:8	0	0	0	0.00235684		0.00148203	0	0	0.000508979
																								PC 42:7	0.00154096	0	0.00679116	0.0118239		0.0150981	0.00409454	0	0
	PC 38:7	0.0499214	0.0307918	0.10851	0.110154		0.102817	0.058292	0.0182855	0.00332313														PC 42:6	0.00177162	0.0141991	0.0392326	0.038845		0.0201139	0.103131	0.0408863	0.025062
	PC 40:7	0.0219807	0	0.0969177	0.11663		0.139975	0.0561614	0	0														PC 42:5	0	0	0.0485139	0		0.00194035	0.000462309	0.00203053	0
	PC 42:7	0.00154096	0	0.00679116	0.0118239		0.0150981	0.00409454	0	0														PC 42:4	0	0	0.00200589	0.0835297		0	0.0287544	0.0722556	0.0844848
	PC 44:7	0	0	0	0		0	0.00032279	0.0127827	0														PC 42:3	0	0.000378971	0.012022	0		0.00052101	0	0	0
		0.0734431	0.0307918	0.212218	0.238608		0.25789	0.118871	0.0310682	0.00332313														PC 42:2	0.00160752	0.00187195	0.00313985	0.00345565		0	0.00164667	0.00197468	0
																								PC 42:1	0	0	0	0		0	0	0.00960894	0.00241136
	PC 42:8	0	0	0	0.00235684		0.00148203	0	0	0.000508979															0.0126753	0.266042	0.171088	0.198438		0.0998648	0.231514	0.220642	0.194857
	PC 44:8	0	0	0	0		0	0	0	0
		0	0	0	0.00235684		0.00148203	0	0	0.000508979														PC 44:11	0.482329	0.632822	0.512322	0.482465		0.589002	0.541895	0.666261	0.718926
																								PC 44:9	0.0453414	0	0.0309916	0.0218294		0.0512772	0.0486506	0	0
	PC 42:9	0.00371013	0.221631	0.00131806	0.0085395		0.00779611	0.0136107	0	0														PC 44:3	0	0	0	0		0	0	0	0
	PC 44:9	0.0453414	0	0.0309916	0.0218294		0.0512772	0.0486506	0	0														PC 44:2	0	0	0	0		0	0.00032279	0.0127827	0
		0.0490515	0.221631	0.0323096	0.0303689		0.0590733	0.0622614	0	0														PC 44:7	0	0	0	0		0	0.00032279	0.0127827	0
																								PC 44:8	0	0	0	0		0	0	0	0
	PC 44:11	0.482329	0.632822	0.512322	0.482465		0.589002	0.541895	0.666261	0.718926															0.527671	0.632822	0.543313	0.504294		0.640279	0.591191	0.691826	0.718926
	PC 42:11	0.00404506	0.0279605	0.0580641	0.0498872		0.0529133	0.079814	0.0938857	0.0823896
		0.486375	0.660783	0.570386	0.532352		0.641915	0.621709	0.760146	0.801315
Note	PC unsaturation in ER is part of Fig.4e
	PC chain length in ER is part of Fig.4e

## Sheet: Fig. 4c
					Lipid species expressed as mol% of total lipid analyzed
		WC						PM
		Rep 1	Rep 2	Rep 3	Rep 4	Rep 5		Rep 1	Rep 2	Rep 3	Rep 4	Rep 5
	SM	4.51735	4.62135	4.73356	5.26485	4.78737		10.3821	9.34366	8.89489	10.3418	10.4422
	Cer	0.309135	0.321604	0.316738	0.34905	0.296172		0.108314	0.03754	0.141682	0.189668	0.196637
	Cer/SM	0.0684328	0.0695909	0.0669132	0.0662982	0.0618652		0.0104328	0.0040177	0.0159285	0.0183399	0.018831
	Chol	18.5735	21.4942	21.696	16.0479	15.0767		41.8592	44.1711	35.0653	34.0608	33.4871
	PG	0.33413	0.452849	0.504144	0.280684	0.308082		0.063427	0.00237533	0.0332507	0.0309548	0.0182096
	PS	1.55476	1.58554	1.79901	1.24306	1.45468		2.98357	3.16776	2.84372	4.24812	4.53539
	CL	0.552623	0.47505	0.820038	3.4201	2.80431		0	0	0	0	0.00288416
		Average		STD		p value, paired two-tailed t-test
		WC	PM	WC	PM
	SM	4.7849	9.88093	0.287803	0.714065	4.27351e-07
	Cer	0.31854	0.134768	0.0195722	0.0652738	0.00031272
	Cer/SM	0.0666201	0.01351	0.00295422	0.00626625	1.36345e-07
	Chol	18.5777	37.7287	3.03672	4.92707	7.62727e-05
	PG	0.375978	0.0296435	0.0971826	0.0225297	5.41918e-05
	PS	1.52741	3.55571	0.202506	0.778457	0.000487887
	CL	1.61443	0.000576833	1.39041	0.00128984	0.0318445
	Note- data in 4c are part of 4d

## Sheet: Fig. 4d
					Lipid species expressed as mol% of total lipid analyzed
	WT															∆SMS1/2															SMS2															SMS2M64R
	WC					PM					Average		Std			WC					PM					Average		Std			WC					PM					Average		Std			WC
	Replicate 1	Replicate 2	Replicate 3	Replicate 4	Replicate 5	Replicate 1	Replicate 2	Replicate 3	Replicate 4	Replicate 5	WC	PM	WC	PM		Replicate 1	Replicate 2	Replicate 3	Replicate 4	Replicate 5	Replicate 1	Replicate 2	Replicate 3	Replicate 4	Replicate 5	WC	PM	WC	PM		Replicate 1	Replicate 2	Replicate 3	Replicate 4	Replicate 5	Replicate 1	Replicate 2	Replicate 3	Replicate 4	Replicate 5	WC	PM	WC	PM		Replicate 1	Replicate 2	Replicate 3	Replicate 4
SM	4.51735	4.62135	4.73356	5.26485	4.78738	10.3821	9.34366	8.89489	10.3418	10.4422	4.7849	9.88093	0.287803	0.714064		0.490649	0.275342	0.285753	0.303724	0.253666	0.739613	0.777897	0.660278	0.645	0.678739	0.321827	0.700305	0.0960946	0.0563283		4.40066	5.28629	5.58965	4.98443	5.42762	9.17916	9.81591	9.29608	10.6545	9.98478	5.13773	9.78609	0.468272	0.592246		6.42167	6.60936	6.37632	8.96421
Chol	18.5735	21.4942	21.696	16.0479	15.0767	41.8592	44.1711	35.0653	34.0608	33.4871	18.5777	37.7287	3.03672	4.92707		23.2555	21.9433	25.5301	19.0241	16.6168	46.6612	41.2809	44.6133	41.325	41.4936	21.274	43.0748	3.50858	2.44995		23.7947	25.5591	28.493	19.0241	19.6323	50.3923	52.5848	43.7651	36.6472	38.4578	23.3006	44.3694	4.00159	7.04826		24.2818	23.5123	24.5296	18.1762
GSL	0.799319	0.58047	0.837133	3.08097	2.87746	1.45323	1.42096	1.66443	1.83104	2.11935	1.63507	1.69781	1.23304	0.288542		2.10441	1.82757	2.32311	4.15439	4.60814	3.64507	3.5333	3.62068	2.34102	1.97902	3.00352	3.02382	1.27999	0.799934		1.46821	1.50923	1.45553	3.87887	3.4062	3.63024	2.50696	2.7288	2.27081	2.43914	2.34361	2.71519	1.19764	0.537247		1.6408	1.52352	1.56297	2.90839
PC	36.6646	40.5684	37.9939	40.2421	36.8482	21.9964	19.8784	23.7825	20.6582	20.4374	38.4635	21.3506	1.84795	1.56621		45.8599	44.3778	45.0434	45.2962	47.1433	30.4819	35.198	27.7909	27.9908	28.5411	45.5441	30.0005	1.04037	3.09425		36.9607	40.8865	37.2149	35.6546	39.6431	15.3144	18.2828	18.094	22.084	19.8899	38.072	18.733	2.13328	2.49328		36.0362	33.7857	30.1937	34.266
Cer	0.309135	0.321604	0.316738	0.34905	0.296172	0.108314	0.0375397	0.141682	0.189668	0.196637	0.31854	0.134768	0.0195721	0.0652739		0.420097	0.335731	0.400868	0.377849	0.327698	0.229576	0.273505	0.204281	0.275587	0.228031	0.372449	0.242196	0.040181	0.0311956		0.163584	0.177116	0.233915	0.286111	0.303471	0.0270942	0.0746599	0.154546	0.278873	0.335725	0.232839	0.17418	0.0627082	0.131322		0.154713	0.138444	0.200842	0.155112
PE	13.0094	7.29424	9.65197	9.58166	12.8244	4.13063	4.37635	5.71134	4.79314	4.46371	10.4723	4.69504	2.42566	0.615655		5.52624	8.80893	5.31882	8.68407	10.2254	2.04877	1.72373	2.66107	3.78342	3.44739	7.71269	2.73288	2.17774	0.881152		9.83903	5.4796	5.40683	10.8186	8.25321	1.7979	1.53195	4.32894	3.04805	3.65193	7.95946	2.87175	2.47283	1.19493		8.90067	11.1092	11.2783	12.416
DAG	0.732919	0.331836	0.780827	0.942721	0.871768	0.446758	1.37266	1.05039	1.59376	2.25232	0.732014	1.34318	0.237936	0.666989		1.59084	1.18447	1.78684	1.8589	1.72567	0.295909	0.938811	0.801214	1.93285	1.34976	1.62934	1.06371	0.267476	0.614665		0.777983	1.00647	1.32048	1.35166	1.06927	3.45996	0.542354	0.726785	2.49883	2.52409	1.10517	1.9504	0.237276	1.26377		0.824959	0.675798	1.74209	1.43974
PI	3.61936	4.35059	3.87566	2.37017	2.80744	1.20924	1.42414	1.91835	2.65089	2.37495	3.40464	1.91551	0.804606	0.610765		2.39286	1.97254	3.19845	3.03716	2.77427	0.98657	2.05338	1.3942	1.53281	1.81334	2.67506	1.55606	0.497011	0.40761		2.70771	2.56442	3.59538	3.42642	2.84182	0.850837	0.363272	1.04276	1.81542	2.51109	3.02715	1.31668	0.456294	0.847998		3.69718	3.52165	3.74531	4.15976
PS	1.55476	1.58554	1.79901	1.24306	1.45468	2.98357	3.16776	2.84372	4.24812	4.53539	1.52741	3.55571	0.202506	0.778457		1.24728	1.40106	1.4046	1.69518	1.61072	2.96557	3.13023	3.37971	3.70708	4.28874	1.47177	3.49427	0.179669	0.524797		1.48459	1.45531	1.57157	2.11725	1.63995	3.55826	3.12556	2.83265	3.38441	3.97017	1.65373	3.37421	0.269154	0.431352		1.65777	1.48103	1.64145	1.73895
Chol ester	1.46934	1.61907	1.42396	1.6169	1.33322	0.4743	1.45614	1.79274	1.08893	2.80682	1.4925	1.52379	0.124601	0.86799		3.60008	3.20913	2.70544	2.13735	1.84205	0.44953	0.420856	1.76433	1.8509	1.21209	2.69881	1.13954	0.728359	0.688164		1.19716	1.26542	0.927685	1.37185	1.30094	0.241409	0.411145	0.324753	0.808367	0.78249	1.21261	0.513633	0.171297	0.264309		1.4275	1.44257	2.26256	0.992623
	p value, paired two-tailed t-test
	WT vs ∆SMS1/2		SMS2 vs SMS2M64R
	WC	PM	WC	PM
SM	7.84931e-06	9.16925e-06	0.0230845	0.14195
Chol	0.024344	0.07173	0.137263	0.0331533
GSL	0.000257446	0.0503007	0.661297	0.917135
PC	0.00434257	0.0093919	0.0358212	0.216295
Cer	0.0438519	0.0383818	0.0600073	0.61612
PE	0.144739	0.00926669	0.0766885	0.896634
DAG	7.11699e-06	0.237769	0.435262	0.814212
PI	0.233061	0.27768	0.00886889	0.387963
PS	0.742015	0.745412	0.755388	0.907424
Chol ester	0.018316	0.407791	0.472742	0.450181
[truncated: 10 more columns]

## Sheet: Fig. 4e
PM: SM species in order of double bonds													PM: # double bonds in SM sspecies														PM: SM species in order of carbons														PM: # of carbons in SM
SMS2						SMS2M64R							SMS2						SMS2M64R								SMS2						SMS2M64R								SMS2						SMS2M64R
Rep 1	Rep 2	Rep 3	Rep 4	Rep 5		Rep 1	Rep 2	Rep 3	Rep 4	Rep 5		# double bonds	Rep 1	Rep 2	Rep 3	Rep 4	Rep 5		Rep 1	Rep 2	Rep 3	Rep 4	Rep 5				Rep 1	Rep 2	Rep 3	Rep 4	Rep 5		Rep 1	Rep 2	Rep 3	Rep 4	Rep 5			# carbons	Rep 1	Rep 2	Rep 3	Rep 4	Rep 5		Rep 1	Rep 2	Rep 3
0	0	0.000471	0	0		0	0.011156	0.046184	0.092808	0.100305		0	0.011183	0.010605	0.050079	0.001111	0.003388		0.596277	0.355566	0.780775	1.07447	1.14293			SM 32:2;2	0	0	0.003117	0.024935	0.000839		0	0.150849	0	0.007808	0.010751			32	0.159187	0.16094	0.348023	0.135558	0.132491		0.199946	0.227785	0.455208
0.011183	0.010605	0.046613	0	0.002991		0.596277	0.34441	0.691862	0.918088	0.973405		1	8.03377	8.35822	6.88402	3.88249	4.28796		6.25544	4.55971	5.87537	6.1935	6.60457			SM 32:1;2	0.159187	0.16094	0.344435	0.110623	0.131652		0.199946	0.06578	0.409024	0.397847	0.420518			34	7.38765	7.79327	5.91709	2.99364	3.28986		6.33067	4.63941	5.63405
0	0	0.002995	0.001111	0.000397		0	0	0.042729	0.063141	0.069216		2	1.01787	1.35357	1.90401	0.946078	0.982099		0.4158	0.283976	1.39465	1.36531	1.43813			SM 32:0;2	0	0	0.000471	0	0		0	0.011156	0.046184	0.092808	0.100305			36	0.680745	0.778449	1.01658	0.913899	0.992211		0.453995	0.235626	0.842269
0	0	0	0	0		0	0	0	0.000432	0		3	0.116334	0.093509	0.457971	0.154745	0.154176		0	0.006321	0.29224	0.330929	0.343515				0.159187	0.16094	0.348023	0.135558	0.132491		0.199946	0.227785	0.455208	0.498463	0.531574			38	0.014719	0.038236	0.247302	0.163753	0.17834		0.0047	0.007979	0.167272
0.011183	0.010605	0.050079	0.001111	0.003388		0.596277	0.355566	0.780775	1.07447	1.14293			9.17916	9.81591	9.29608	4.98443	5.42762		7.26752	5.20557	8.34304	8.96421	9.52914																	40	0.050584	0.057161	0.549435	0.282347	0.301688		0.00585	0.013679	0.392929
																										SM 34:2;2	0.150895	0.256749	0.380537	0.186824	0.195675		0.091785	0.035483	0.321207	0.222455	0.233656			42	0.886275	0.987849	1.21765	0.495229	0.532582		0.272353	0.081088	0.851316
0.159187	0.16094	0.344435	0.110623	0.131652		0.199946	0.06578	0.409024	0.397847	0.420518																SM 34:1;2	7.22557	7.52592	5.48994	2.80682	3.09119		5.64261	4.25952	4.62098	4.90742	5.18022			44	0	0	0	0	0.000454		0	0	0
7.22557	7.52592	5.48994	2.80682	3.09119		5.64261	4.25952	4.62098	4.90742	5.18022			PM: # double bonds in SM expressed as fraction of total													SM 34:0;2	0.011183	0.010605	0.046613	0	0.002991		0.596277	0.34441	0.691862	0.918088	0.973405				9.17916	9.81591	9.29608	4.98443	5.42762		7.26752	5.20557	8.34304
0.632744	0.638327	0.735313	0.712151	0.782926		0.408183	0.222202	0.606856	0.58026	0.626658			SMS2						SMS2M64R								7.38765	7.79327	5.91709	2.99364	3.28986		6.33067	4.63941	5.63405	6.04796	6.38728
0.014719	0.033033	0.154792	0.125063	0.138521		0.0047	0.005766	0.117185	0.129406	0.141356		# double bonds	Rep 1	Rep 2	Rep 3	Rep 4	Rep 5		Rep 1	Rep 2	Rep 3	Rep 4	Rep5
0.001552	0	0.159535	0.127839	0.14367		0	0.006439	0.11929	0.178565	0.180055		0	0.0012183	0.00108039	0.00538711	0.000222894	0.000624214		0.0820469	0.0683049	0.093584	0.119862	0.11994			SM 36:2;2	0.048001	0.140122	0.278272	0.200637	0.208888		0.045812	0.013424	0.192684	0.194017	0.204513				PM: # carbons in SM expressed as fraction of total
0	0	0	0	0		0	0	0.002039	0	0.055758		1	0.875219	0.851497	0.740529	0.778925	0.790025		0.86074	0.875928	0.704224	0.690914	0.693092			SM 36:1;2	0.632744	0.638327	0.735313	0.712151	0.782926		0.408183	0.222202	0.606856	0.58026	0.626658				SMS2						SMS2M64R
8.03377	8.35822	6.88402	3.88249	4.28796		6.25544	4.55971	5.87537	6.1935	6.60457		2	0.110889	0.137896	0.204819	0.189807	0.180945		0.0572135	0.0545523	0.167164	0.152307	0.150919			SM 36:0;2	0	0	0.002995	0.001111	0.000397		0	0	0.042729	0.063141	0.069216			# carbons	Rep 1	Rep 2	Rep 3	Rep 4	Rep 5		Rep 1	Rep 2	Rep 3
												3	0.0126737	0.00952627	0.049265	0.0310457	0.0284058		0	0.00121428	0.035028	0.0369167	0.0360489				0.680745	0.778449	1.01658	0.913899	0.992211		0.453995	0.235626	0.842269	0.837418	0.900387			32	0.0173422	0.0163958	0.0374376	0.0271963	0.0244105		0.0275123	0.0437579	0.0545614
0	0	0.003117	0.024935	0.000839		0	0.150849	0	0.007808	0.010751																														34	0.804829	0.793943	0.636515	0.600599	0.606132		0.871092	0.89124	0.675299
0.150895	0.256749	0.380537	0.186824	0.195675		0.091785	0.035483	0.321207	0.222455	0.233656																SM 38:2;2	0	0.005203	0.09251	0.03869	0.039819		0	0.002213	0.050087	0.090279	0.088884			36	0.074162	0.0793048	0.109356	0.183351	0.182808		0.0624691	0.0452642	0.100955
0.048001	0.140122	0.278272	0.200637	0.208888		0.045812	0.013424	0.192684	0.194017	0.204513		# double bonds	Average		Std		p value, paired two-tailed t-test									SM 38:1;2	0.014719	0.033033	0.154792	0.125063	0.138521		0.0047	0.005766	0.117185	0.129406	0.141356			38	0.00160352	0.00389531	0.0266028	0.0328529	0.0328578		0.000646713	0.00153278	0.0200493
0	0.005203	0.09251	0.03869	0.039819		0	0.002213	0.050087	0.090279	0.088884			SMS2	SMS2M64R	SMS2	SMS2M64R											0.014719	0.038236	0.247302	0.163753	0.17834		0.0047	0.007979	0.167272	0.219685	0.23024			40	0.00551075	0.0058233	0.0591039	0.0566458	0.0555838		0.000804952	0.00262776	0.0470966
0.049032	0.050413	0.309273	0.133508	0.140389		0.00585	0.00724	0.240841	0.290963	0.315659		0	0.00170658	0.0967476	0.00209462	0.0229526	0.00083413																							42	0.096553	0.100638	0.130985	0.0993552	0.0981244		0.0374754	0.0155772	0.102039
0.769941	0.901088	0.840305	0.361484	0.396035		0.272353	0.074767	0.589835	0.55979	0.584489		1	0.807239	0.76498	0.0550643	0.0946367	0.136589									SM 40:3;2	0	0.006748	0.080627	0.021	0.017629		0	0	0.032798	0.089278	0.09093			44	0	0	0	0	8.36462e-05		0	0	0
0	0	0	0	0.000454		0	0	0	0	0.000177		2	0.164871	0.116431	0.0391078	0.0556462	0.00709658									SM 40:2;2	0.049032	0.050413	0.309273	0.133508	0.140389		0.00585	0.00724	0.240841	0.290963	0.315659
1.01787	1.35357	1.90401	0.946078	0.982099		0.4158	0.283976	1.39465	1.36531	1.43813		3	0.0261833	0.0218416	0.015979	0.0194006	0.402616									SM 40:1;2	0.001552	0	0.159535	0.127839	0.14367		0	0.006439	0.11929	0.178565	0.180055
																										SM 40:0;2	0	0	0	0	0		0	0	0	0.000432	0			# carbons	Average		Std		p value, paired two-tailed t-test
0	0.006748	0.080627	0.021	0.017629		0	0	0.032798	0.089278	0.09093																	0.050584	0.057161	0.549435	0.282347	0.301688		0.00585	0.013679	0.392929	0.559238	0.586644				SMS2	SMS2M64R	SMS2	SMS2M64R
0.116334	0.086761	0.377344	0.133745	0.136547		0	0.006321	0.259442	0.241651	0.252585																														32	0.0245565	0.0474443	0.00853749	0.0122239	0.00455096
0.116334	0.093509	0.457971	0.154745	0.154176	0	0	0.006321	0.29224	0.330929	0.343515																SM 42:3;2	0.116334	0.086761	0.377344	0.133745	0.136547		0	0.006321	0.259442	0.241651	0.252585			34	0.688403	0.75652	0.102304	0.114025	0.00192369
																										SM 42:2;2	0.769941	0.901088	0.840305	0.361484	0.396035		0.272353	0.074767	0.589835	0.55979	0.584489			36	0.125796	0.0793187	0.0539923	0.02419	0.0608532
																										SM 42:1;2	0	0	0	0	0		0	0	0.002039	0	0.055758			38	0.0195625	0.0141795	0.0155801	0.0120813	0.0270289
																											0.886275	0.987849	1.21765	0.495229	0.532582		0.272353	0.081088	0.851316	0.801441	0.892832			40	0.0365335	0.0348956	0.0282063	0.0308995	0.655585
																																								42	0.105131	0.0676382	0.0145316	0.0385885	0.0698427
																										SM 44:2;2	0	0	0	0	0.000454		0	0	0	0	0.000177			44	1.67292e-05	3.71492e-06	3.74077e-05	8.30682e-06	0.373901
																										SM 44:1;2	0	0	0	0	0		0	0	0	0	0
																											0	0	0	0	0.000454		0	0	0	0	0.000177
[truncated: 38 more columns]

## Sheet: Fig. 7c
	NR12A Ratio distribution table
		Cumulated Intensities						Normalized to max
	Ratio	Wild type	∆SMS1/2	SMS2	SMS2M64R				Wild type	∆SMS1/2	SMS2	SMS2M64R
	0	0	0	0	0			0	0	0	0	0
	0.05	12046	0	0	0			0.05	0.000139394	0	0	0
	0.1	0	427905	0	129665			0.1	0	0.00293732	0	0.00103817
	0.15	19225	5698491	74889	2332641			0.15	0.000222469	0.0391168	0.000847617	0.0186764
	0.2	29875	39437487	205283	4726369			0.2	0.000345709	0.270715	0.00232346	0.0378418
	0.25	75858	114185962	589162	8814541			0.25	0.000877817	0.78382	0.00666832	0.0705739
	0.3	153894	145678879	1958486	26582512			0.3	0.00178084	1	0.0221668	0.212834
	0.35	247418	119776524	5004621	57698196			0.35	0.00286308	0.822196	0.0566439	0.461962
	0.4	352057	79144815	14692198	99626475			0.4	0.00407395	0.543283	0.166291	0.797662
	0.45	622869	47512452	29709868	124898054			0.45	0.00720774	0.326145	0.336266	1
	0.5	1204274	27233570	49731464	118755885			0.5	0.0139357	0.186942	0.562876	0.950823
	0.55	2096991	14626342	63302710	85228286			0.55	0.0242661	0.100401	0.71648	0.682383
	0.6	3959419	8463752	77924172	55704105			0.6	0.0458178	0.0580987	0.88197	0.445997
	0.65	6684055	3277357	87673814	33509404			0.65	0.0773469	0.0224971	0.99232	0.268294
	0.7	10466240	1532283	88352390	19026966			0.7	0.121114	0.0105182	1	0.15234
	0.75	16840666	1255912	81888358	9302359			0.75	0.194878	0.0086211	0.926838	0.0744796
	0.8	26256116	282562	67144505	5267018			0.8	0.303832	0.00193962	0.759963	0.0421705
	0.85	38546438	124655	58204517	3383233			0.85	0.446053	0.000855683	0.658777	0.027088
	0.9	57847788	52334	52490466	1623763			0.9	0.669406	0.000359242	0.594104	0.0130007
	0.95	86416629	40539	13564027	1049681			0.95	1	0.000278276	0.153522	0.0084043
	1	85203636	20061	6415689	471162			1	0.985963	0.000137707	0.0726148	0.00377237
	1.05	71644762	0	3302394	445777			1.05	0.829062	0	0.0373775	0.00356913
	1.1	66784473	16148	2107378	183827			1.1	0.77282	0.000110847	0.023852	0.00147182
	1.15	51200225	6722	856642	151845			1.15	0.592481	4.61426e-05	0.00969574	0.00121575
	1.2	46515135	0	613872	172193			1.2	0.538266	0	0.006948	0.00137867
	1.25	37105467	0	330760	100175			1.25	0.429379	0	0.00374365	0.000802054
	1.3	29978193	0	247218	74163			1.3	0.346903	0	0.00279809	0.000593788
	1.35	22755479	0	176878	12882			1.35	0.263323	0	0.00200196	0.00010314
	1.4	17649063	0	129321	25411			1.4	0.204232	0	0.0014637	0.000203454
	1.45	15478727	0	38101	21096			1.45	0.179117	0	0.000431239	0.000168906
	1.5	13299842	0	28985	28683			1.5	0.153904	0	0.000328061	0.000229651
	1.55	10225457	0	114870	6477			1.55	0.118327	0	0.00130013	5.18583e-05
	1.6	8670928	0	13680	0			1.6	0.100339	0	0.000154835	0
	1.65	8083814	0	34057	0			1.65	0.0935447	0	0.000385468	0
	1.7	5935671	0	0	0			1.7	0.0686867	0	0	0
	1.75	5135860	0	0	0			1.75	0.0594314	0	0	0
	1.8	4212930	0	25752	0			1.8	0.0487514	0	0.000291469	0
	1.85	3866704	0	0	0			1.85	0.0447449	0	0	0
	1.9	3173614	0	0	0			1.9	0.0367246	0	0	0
	1.95	0	0	0	0			1.95	0	0	0	0
	2	0	0	0	0			2	0	0	0	0
	Max	86416629	145678879	88352390	124898054

## Sheet: Fig. 7d
	Wild type	∆SMS1/2	SMS2	SMS2M64R			Wild type	∆SMS1/2	SMS2	SMS2M64R
cell 1	1.251	0.413	0.633	0.609		Average	1.1733	0.4322	0.7749	0.5358
cell 2	1.053	0.37	0.877	0.467		Std	0.150236	0.0344898	0.107747	0.0435854
cell 3	1.132	0.384	0.739	0.573
cell 4	1.268	0.488	0.634	0.542
cell 5	1.123	0.387	0.892	0.512			p value, unpaired two tailed test
cell 6	1.179	0.462	0.964	0.594		WT v ∆SMS1/2	5.93474e-34
cell 7	1.254	0.46	0.715	0.551		SMS2 v SMS2M64R	3.09897e-16
cell 8	1.226	0.445	0.607	0.426
cell 9	1.416	0.468	0.813	0.481
cell 10	1.447	0.482	0.783	0.537
cell 11	1.283	0.438	0.793	0.5
cell 12	1.481	0.474	0.757	0.561
cell 13	0.966	0.394	0.704	0.49
cell 14	0.936	0.407	0.662	0.577
cell 15	0.943	0.445	0.699	0.549
cell 16	1.415	0.419	0.735	0.535
cell 17	1.171	0.439	0.699	0.542
cell 18	1.37	0.439	0.977	0.612
cell 19	0.979	0.434	0.763	0.569
cell 20	1.002	0.39	0.622	0.511
cell 21	1.048	0.391	0.734	0.507
cell 22	1.143	0.392	0.705	0.498
cell 23	1.143	0.395	0.777	0.574
cell 24	1.146	0.401	0.751	0.504
cell 25	1.096	0.455	0.832	0.498
cell 26	1.149	0.461	0.787	0.562
cell 27	1.145	0.482	0.781	0.499
cell 28	1.171	0.467	0.94	0.563
cell 29	1.244	0.432	0.845	0.575
cell 30	1.019	0.452	1.027	0.556

## Sheet: Fig. 7e
	NRERcl Ratio distribution table
		Cumulated Intensities						Normalized to max
	Ratio	Wild type	∆SMS1/2	SMS2	SMS2M64R				Wild type	∆SMS1/2	SMS2	SMS2M64R
	0	0	0	0	0			0	0	0	0	0
	0.05	0	0	0	0			0.05	0	0	0	0
	0.1	0	0	0	0			0.1	0	0	0	0
	0.15	0	262325	41490	0			0.15	0	0.000978788	0.000358362	0
	0.2	911424	23324560	2127797	0			0.2	0.0313926	0.0870287	0.0183784	0
	0.25	11371771	161588803	25292278	19695			0.25	0.391684	0.602921	0.218457	0.000381341
	0.3	29033048	268009955	84294115	523528			0.3	1	1	0.728074	0.0101367
	0.35	25198535	207165737	115776910	5798557			0.35	0.867926	0.772978	1	0.112273
	0.4	16188926	104892452	93171676	25629544			0.4	0.557603	0.391375	0.804752	0.496247
	0.45	9410485	54011812	57140851	46207156			0.45	0.32413	0.201529	0.493543	0.894677
	0.5	4816508	33340998	30997943	51646741			0.5	0.165897	0.124402	0.267739	1
	0.55	2643485	24119321	19792541	41246866			0.55	0.0910509	0.0899941	0.170954	0.798634
	0.6	1283165	16306200	10264400	30285167			0.6	0.0441967	0.0608418	0.0886567	0.586391
	0.65	711778	11437559	5826504	20823124			0.65	0.0245161	0.0426759	0.0503253	0.403184
	0.7	610174	7559452	2693751	11310131			0.7	0.0210165	0.0282059	0.0232667	0.21899
	0.75	286584	5847710	1728116	8761290			0.75	0.00987096	0.021819	0.0149263	0.169639
	0.8	197512	4106333	599430	6129067			0.8	0.00680301	0.0153216	0.00517746	0.118673
	0.85	145690	3289806	341939	4060259			0.85	0.00501807	0.0122749	0.00295343	0.078616
	0.9	183796	2504440	327029	3057720			0.9	0.00633058	0.00934458	0.00282465	0.0592045
	0.95	52230	1461288	31258	2129735			0.95	0.00179898	0.00545236	0.000269985	0.0412366
	1	0	0	0	0			1	0	0	0	0
	Max	29033048	268009955	115776910	51646741

[truncated: 5 more sheets: Fig. 7f, Fig. 8c, Fig. 9c, Fig. 9d, Appendix 1 - fig. 3]
